# Supplementary material for: An efficient, step-economical synthesis of β-carboline tethered imidazopyrido[3,4-b]indoles from acetals
Source: Royal Society of Chemistry journal article supplement (doi:10.1039/d4nj01467g), 2024-01-01

# An Efficient and Step-economical Synthesis of $\beta$ -Carboline Tethered Imidazopyrido[3,4-*b*]indoles from Acetals

Vaishali,<sup>a,b\*</sup> Naveen Banyal,<sup>a,c</sup> Shubham Sharma,<sup>d</sup> Manpreet Singh,<sup>e</sup> Chandi C. Malakar,<sup>f</sup> and Virender Singh<sup>\*c</sup>

<sup>a</sup> Department of Chemistry, Dr B R Ambedkar National Institute of Technology (NIT) Jalandhar, 144027, Punjab, India.

<sup>b</sup> Department of Chemistry, BK Birla Institute of Higher Education, Pilani, Rajasthan, India-333031.

<sup>c</sup> Department of Chemistry, Central University of Punjab, Bathinda, 151401, Punjab, India.

<sup>d</sup> Department of Chemistry, GLA University, Mathura, UP, 281406, India.

<sup>e</sup> Department of Chemistry, Baba Farid Group of Institutions, Bathinda, India

<sup>f</sup> Department of Chemistry, NIT Manipur, Imphal, India

Email id: [vaishalisingla4361@gmail.com](mailto:vaishalisingla4361@gmail.com); [virender.singh@cup.edu.in](mailto:virender.singh@cup.edu.in)

## Supporting Information

### Table of Contents

|           |                                                                         |              |
|-----------|-------------------------------------------------------------------------|--------------|
| <b>1.</b> | <b><sup>1</sup>H-NMR and <sup>13</sup>C-NMR spectra of new products</b> | <b>2-31</b>  |
| <b>2.</b> | <b>LCMS data of 15A product</b>                                         | <b>32</b>    |
| <b>3.</b> | <b>Photophysical studies of synthesised compounds</b>                   | <b>33-38</b> |

## 1.0 <sup>1</sup>H and <sup>13</sup>C-NMR of the new products

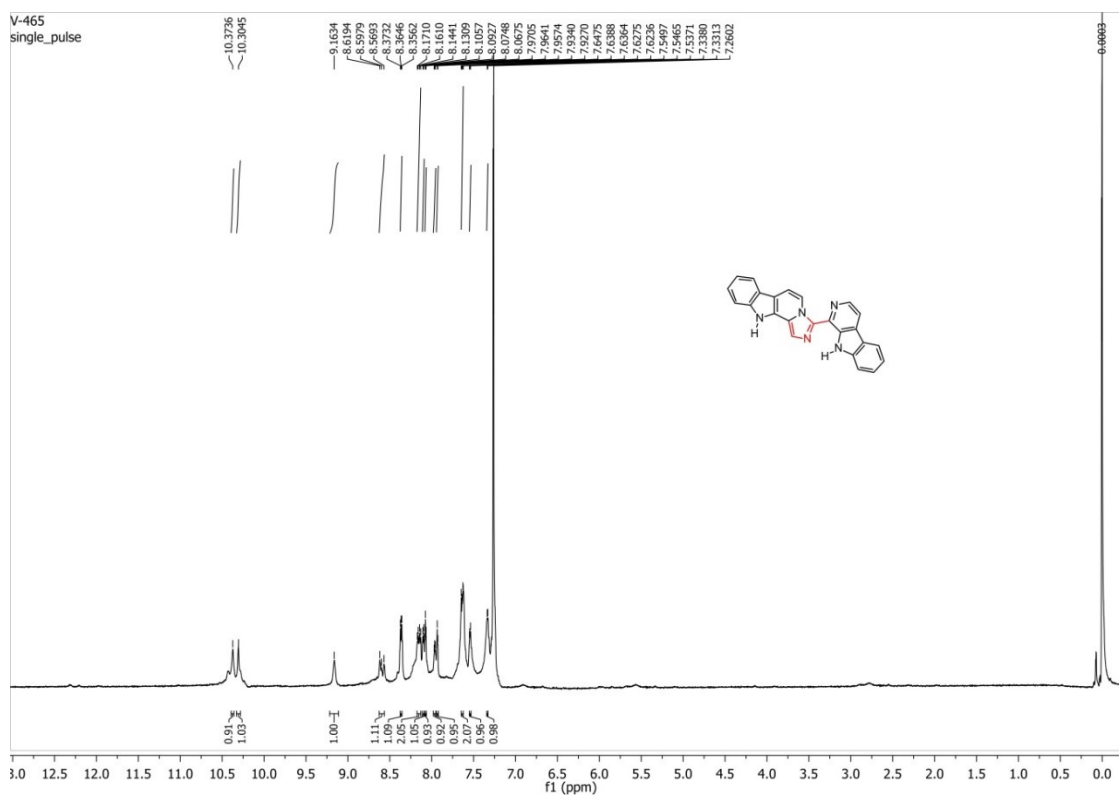

Figure S1. <sup>1</sup>H-NMR spectrum of 14.

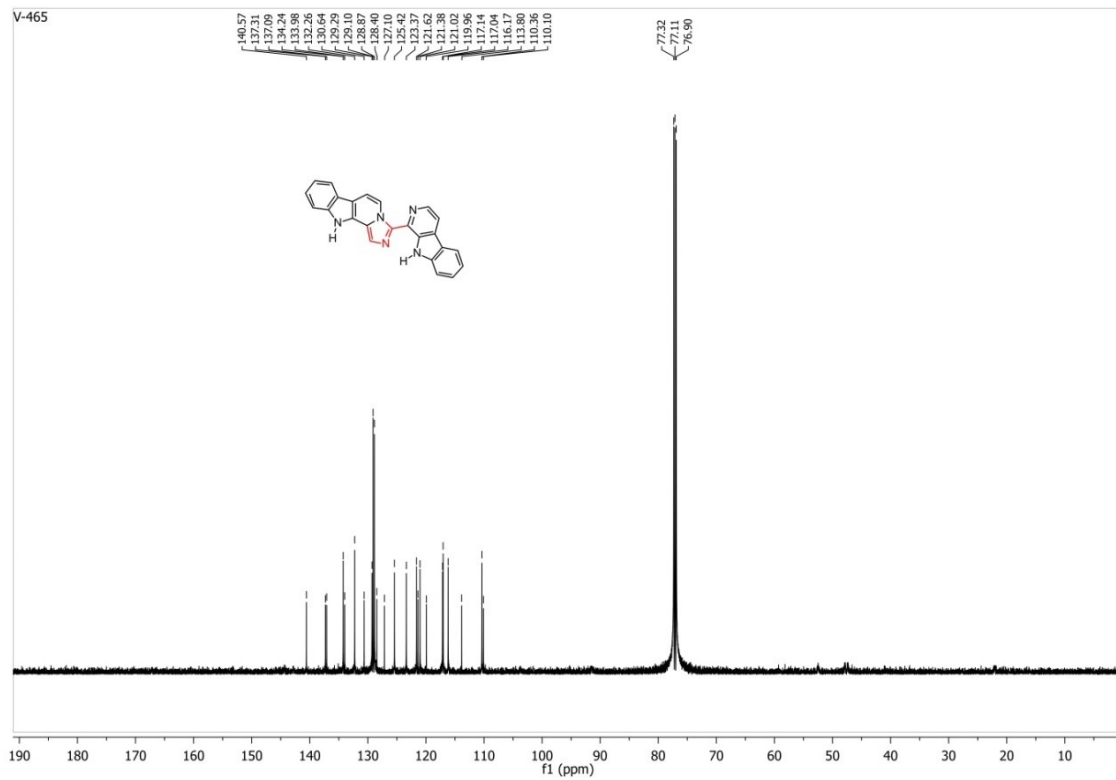

Figure S2. <sup>13</sup>C-NMR spectrum of 14.

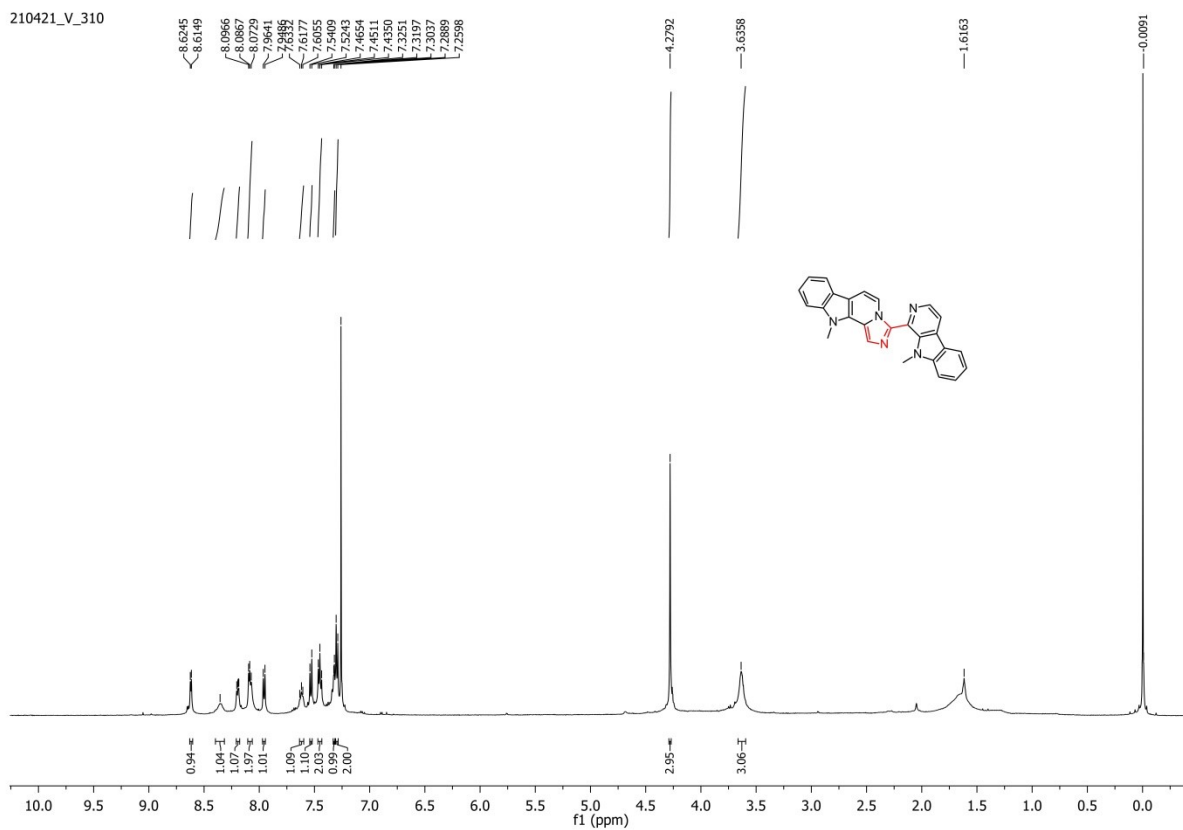

**Figure S3.**  $^1\text{H-NMR}$  spectrum of **15A**.

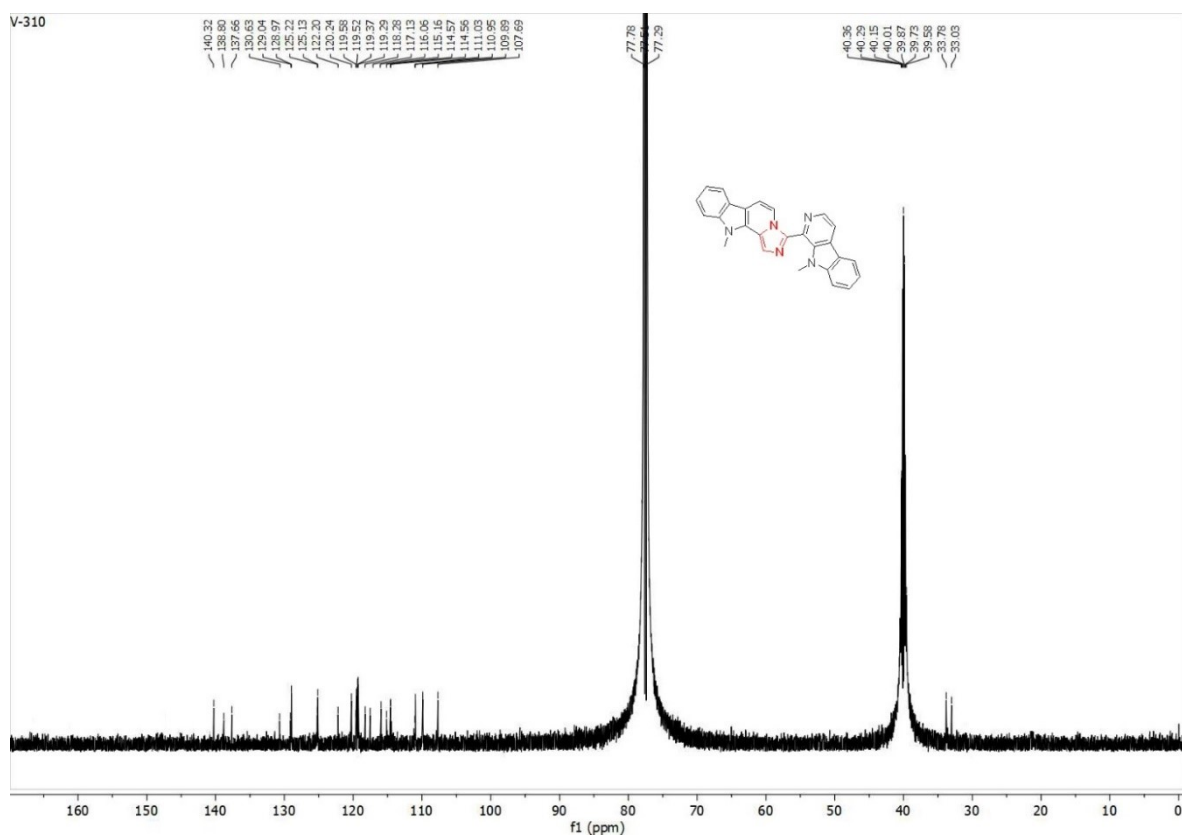

**Figure S4.**  $^{13}\text{C-NMR}$  spectrum of **15A**.

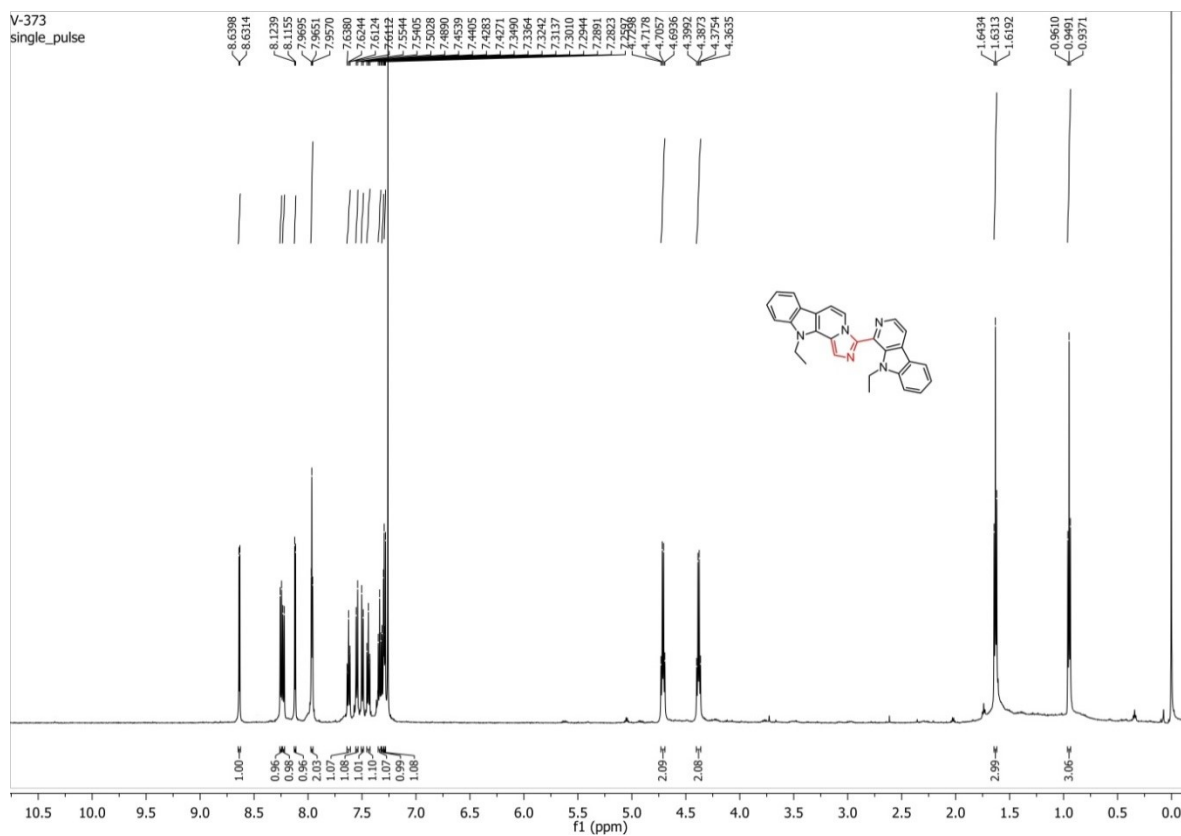

Figure S5.  $^1\text{H}$ -NMR spectrum of **15B**.

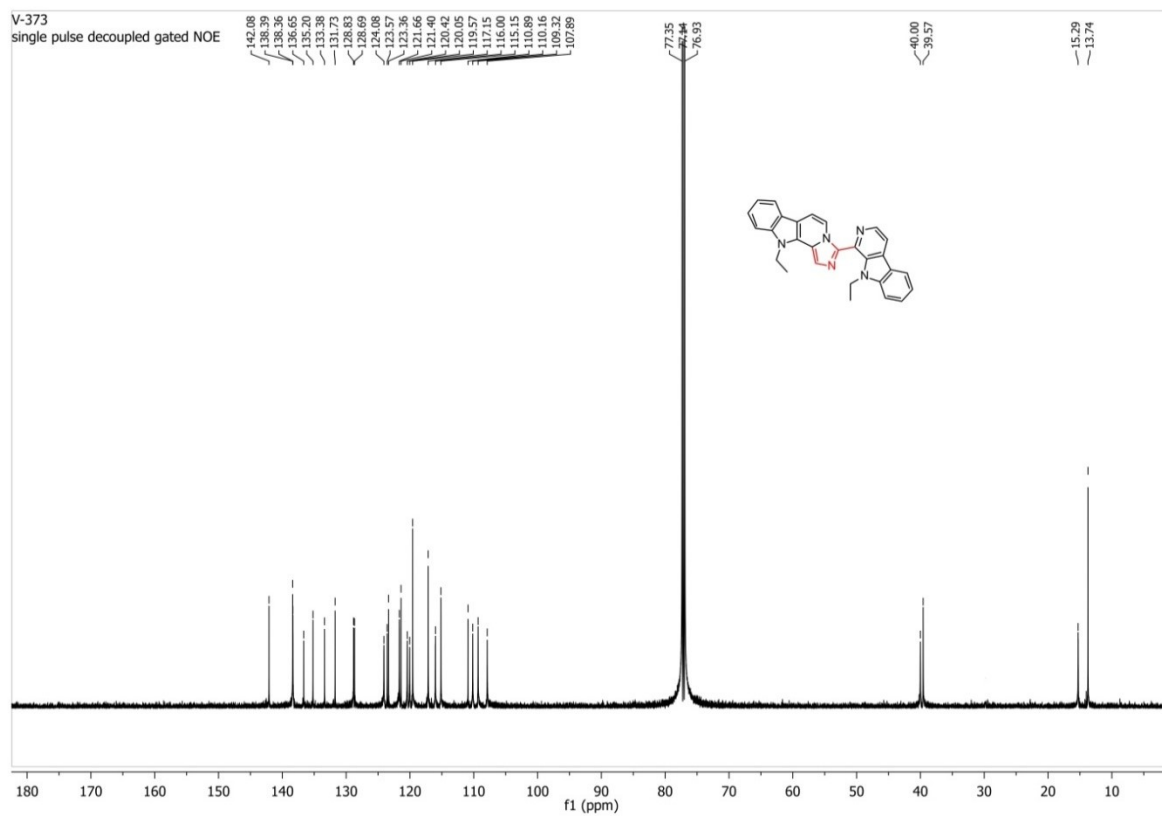

Figure S6.  $^{13}\text{C}$ -NMR spectrum of **15B**.

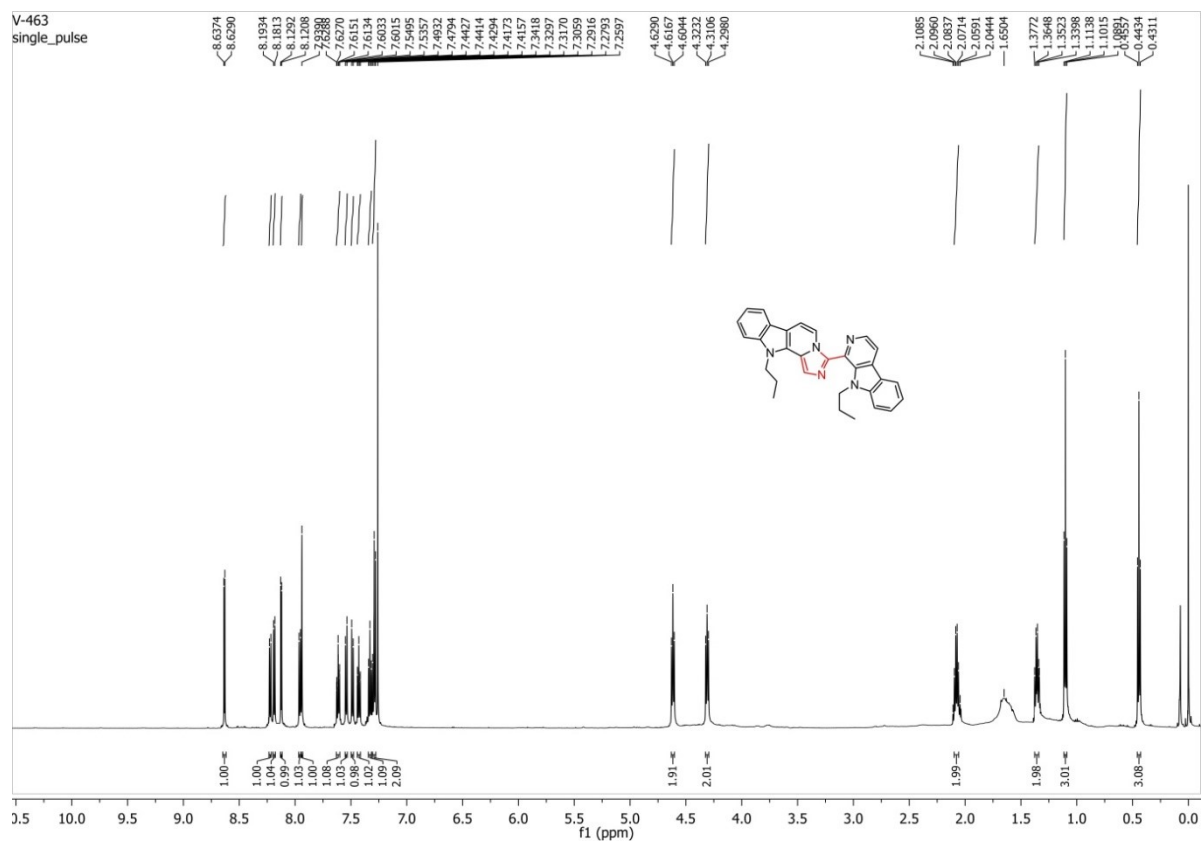

Figure S7.  $^1\text{H-NMR}$  spectrum of **15C**.

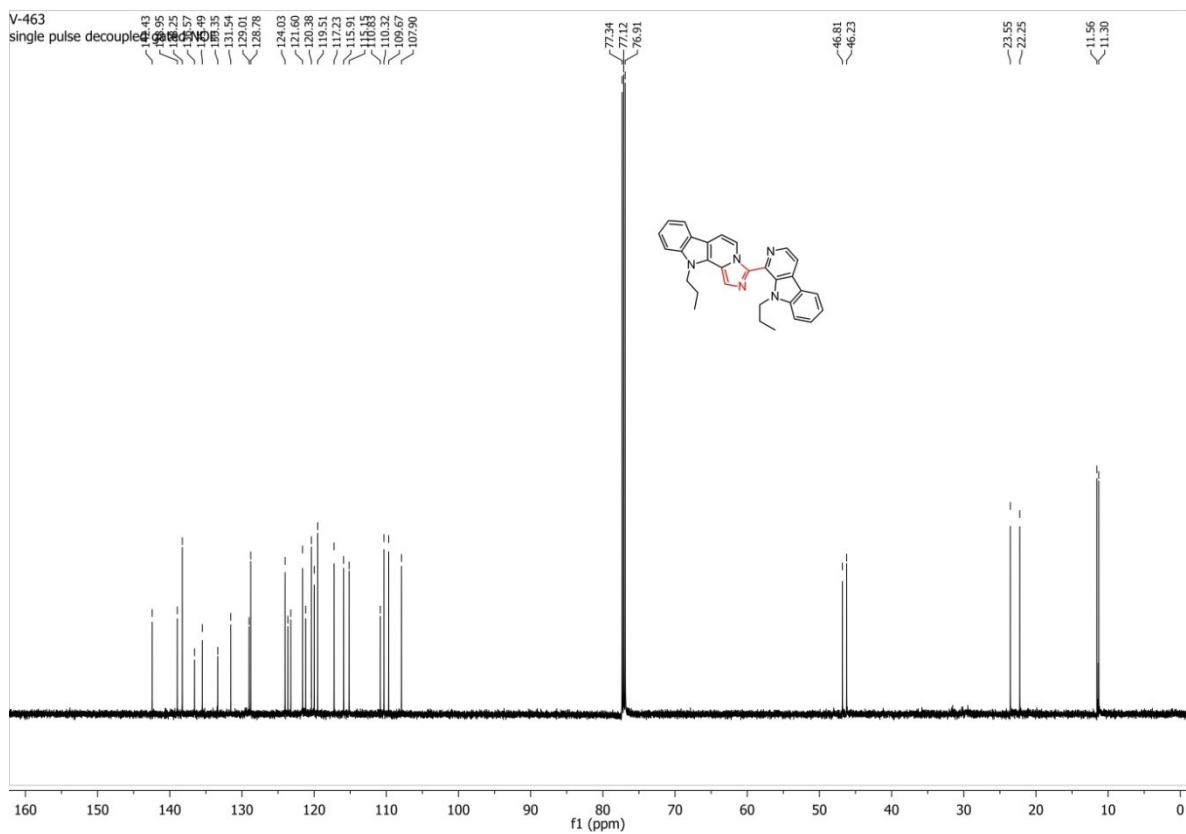

Figure S8.  $^{13}\text{C-NMR}$  spectrum of **15C**.

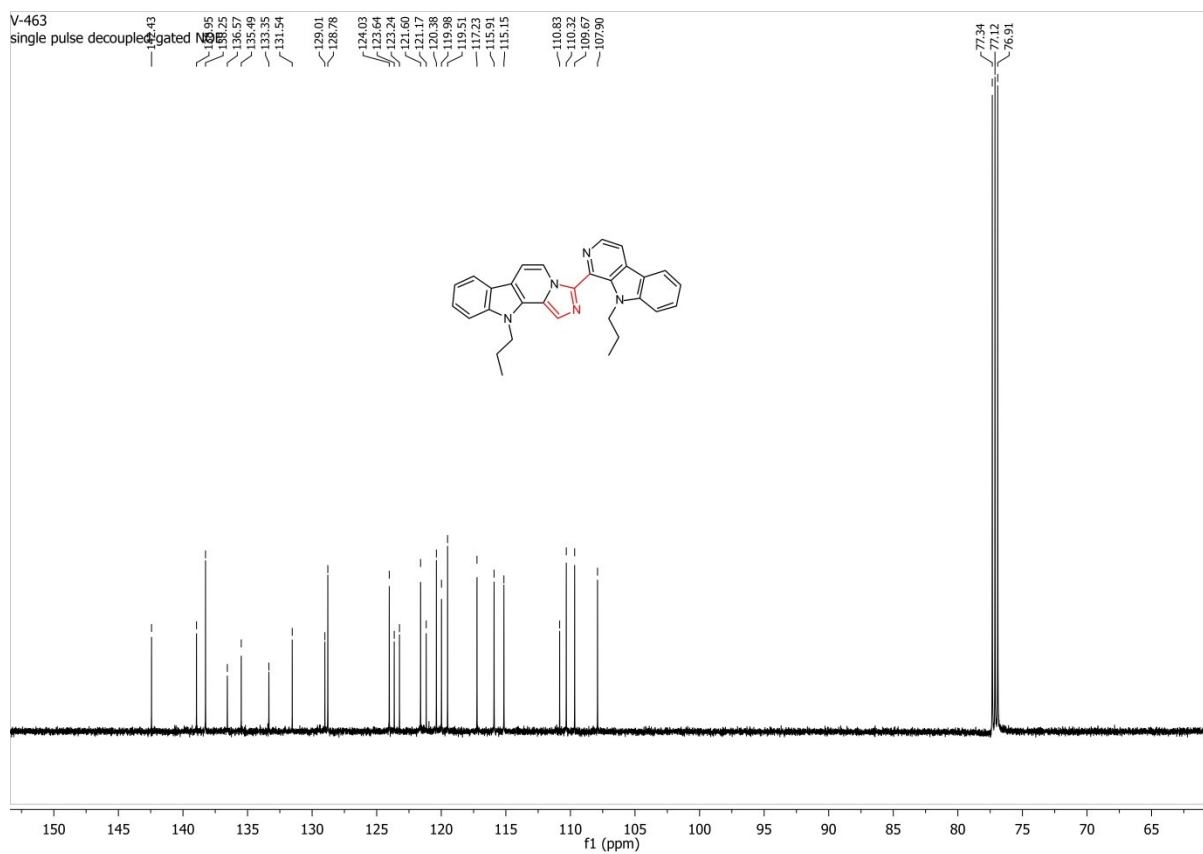

**Figure S9.** Extended  $^{13}\text{C}$ -NMR spectrum of **15C**.

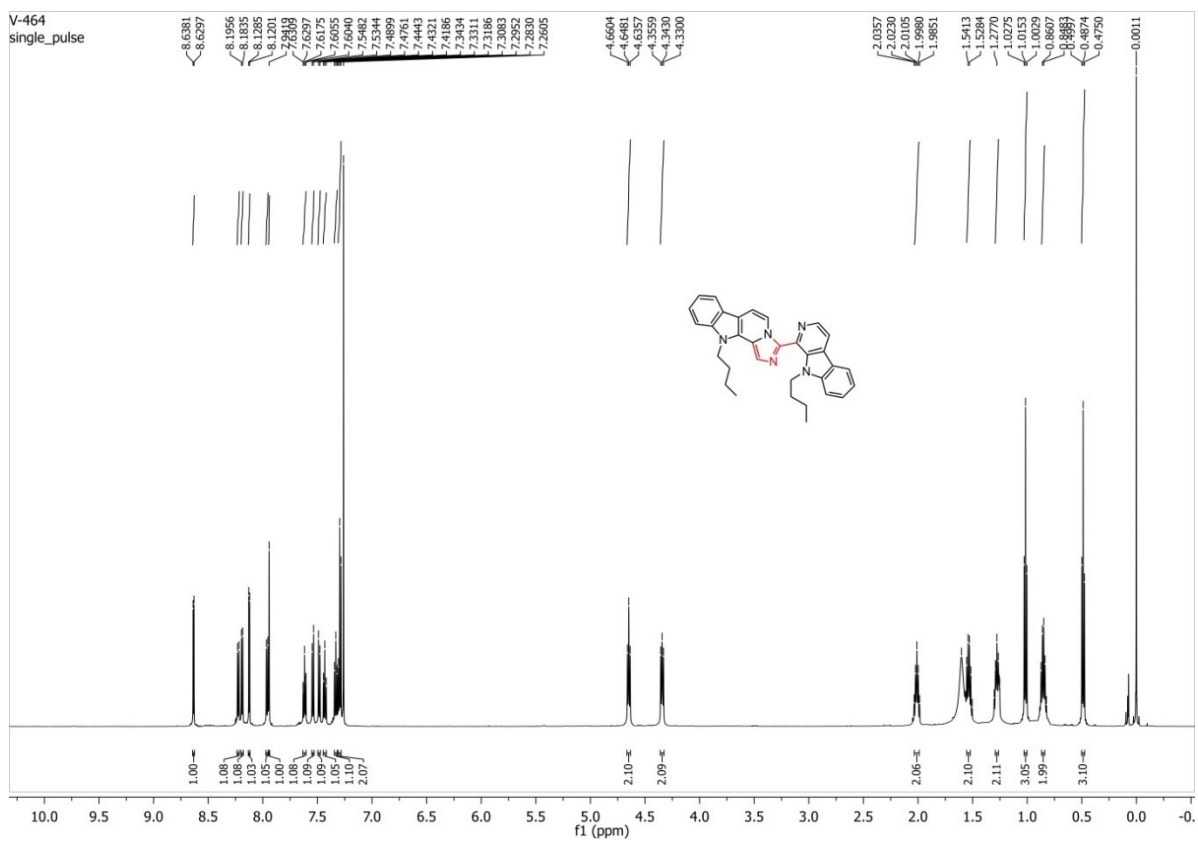

Figure S10.  $^1\text{H}$ -NMR spectrum of 15D.

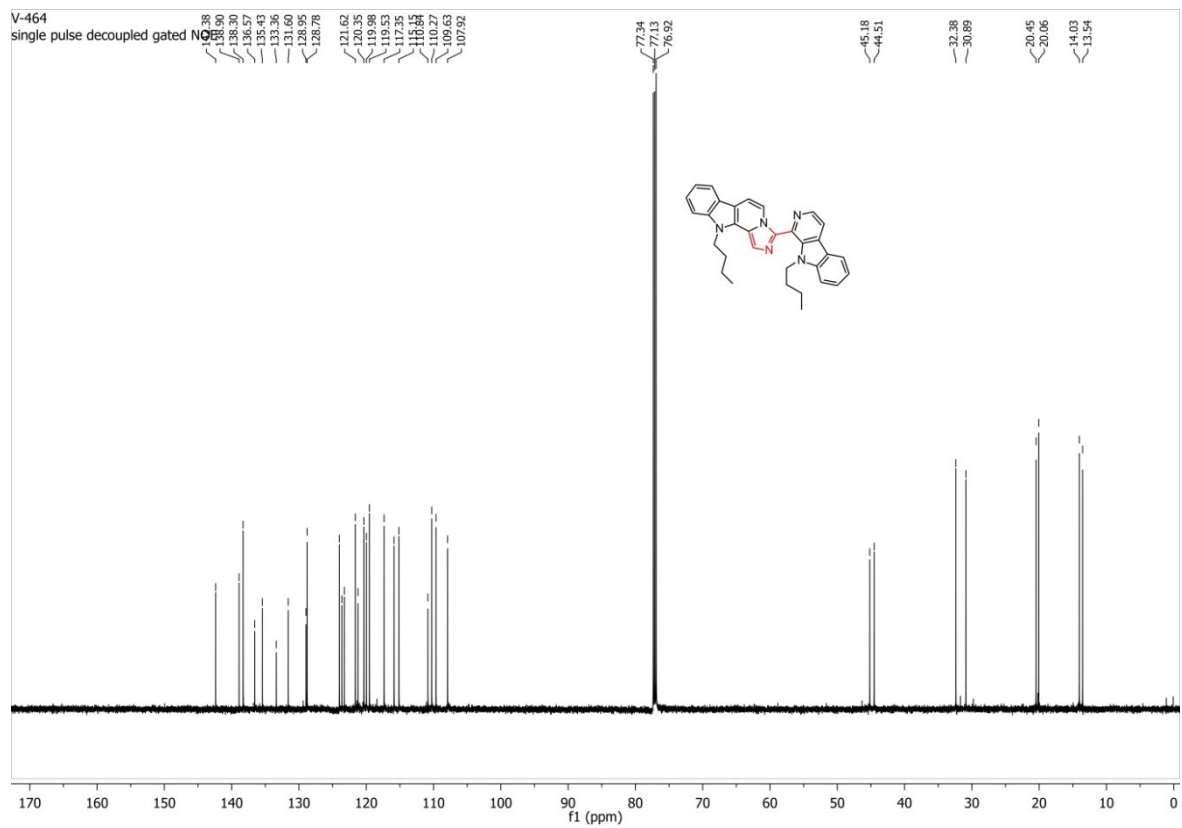

Figure S11.  $^{13}\text{C}$ -NMR spectrum of 15D.

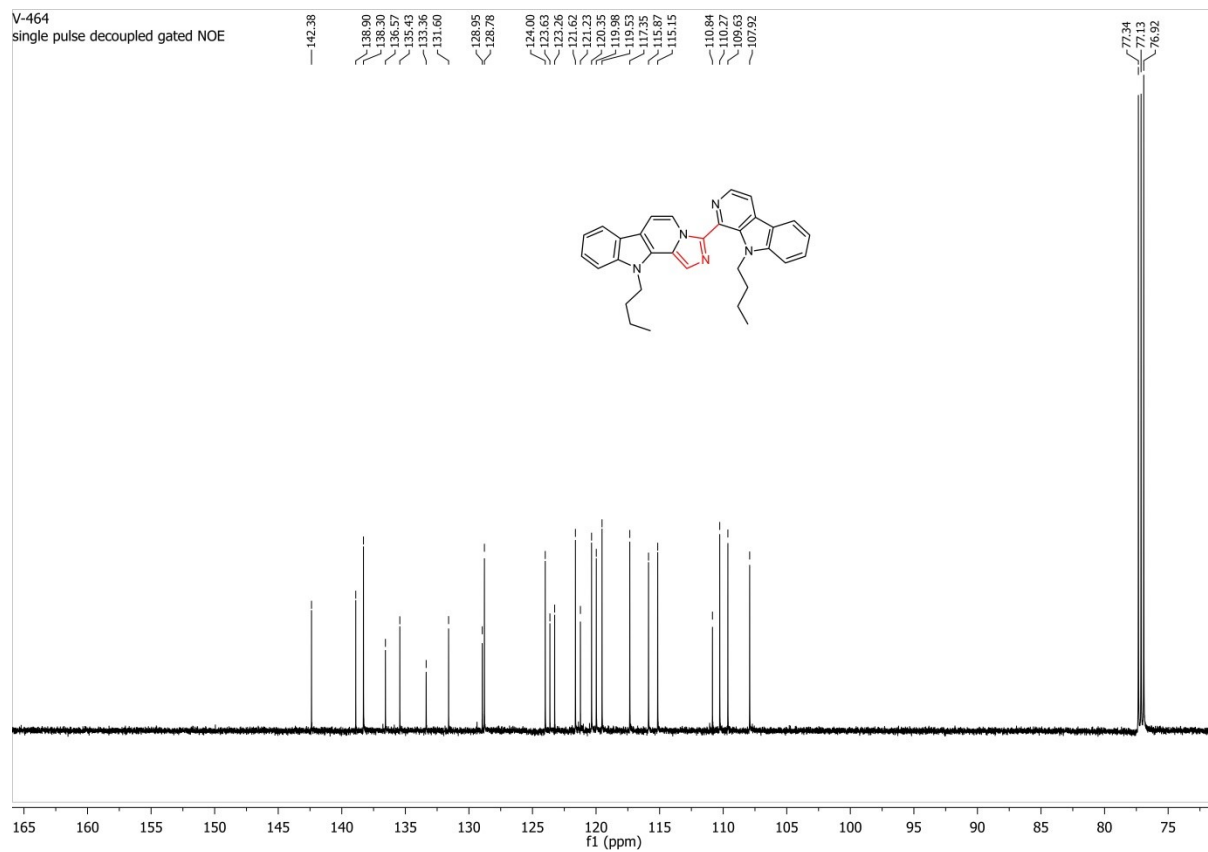

**Figure S12.** Extended  $^{13}\text{C}$ -NMR spectrum of **15D**.



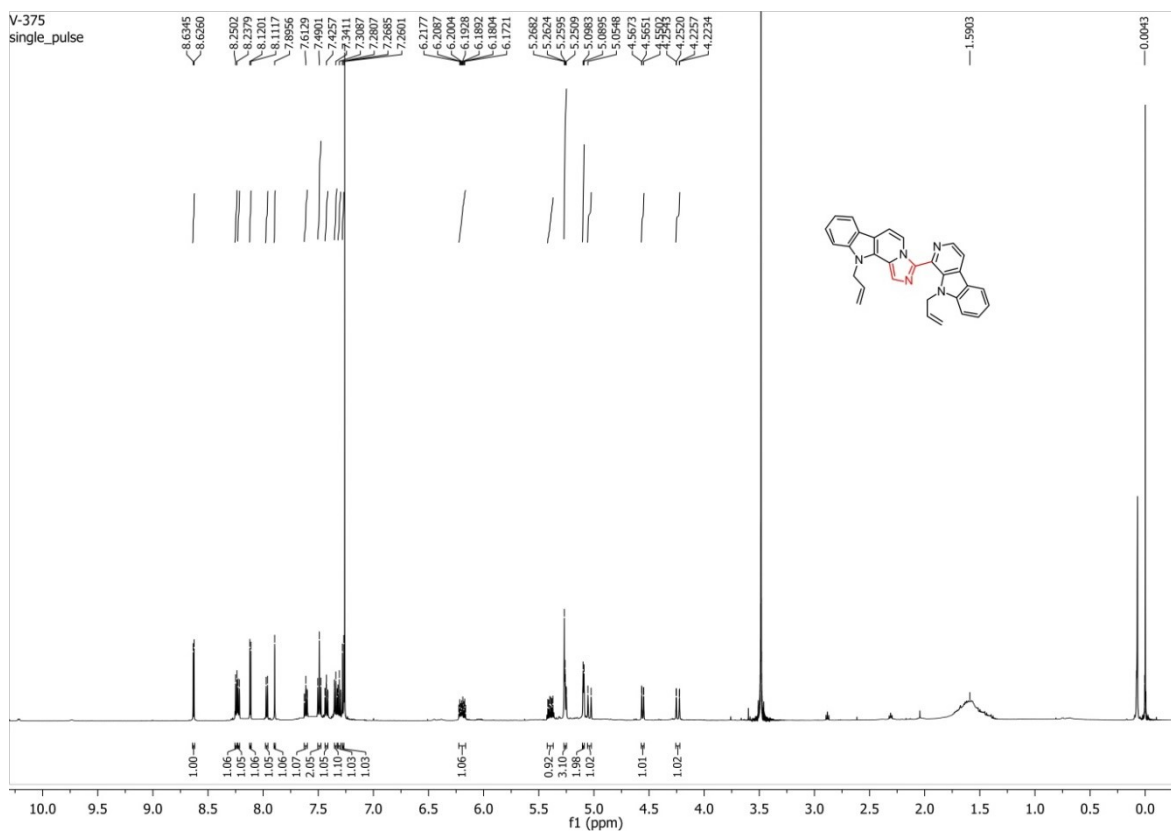

Figure S13.  $^1\text{H}$ -NMR spectrum of 15E.

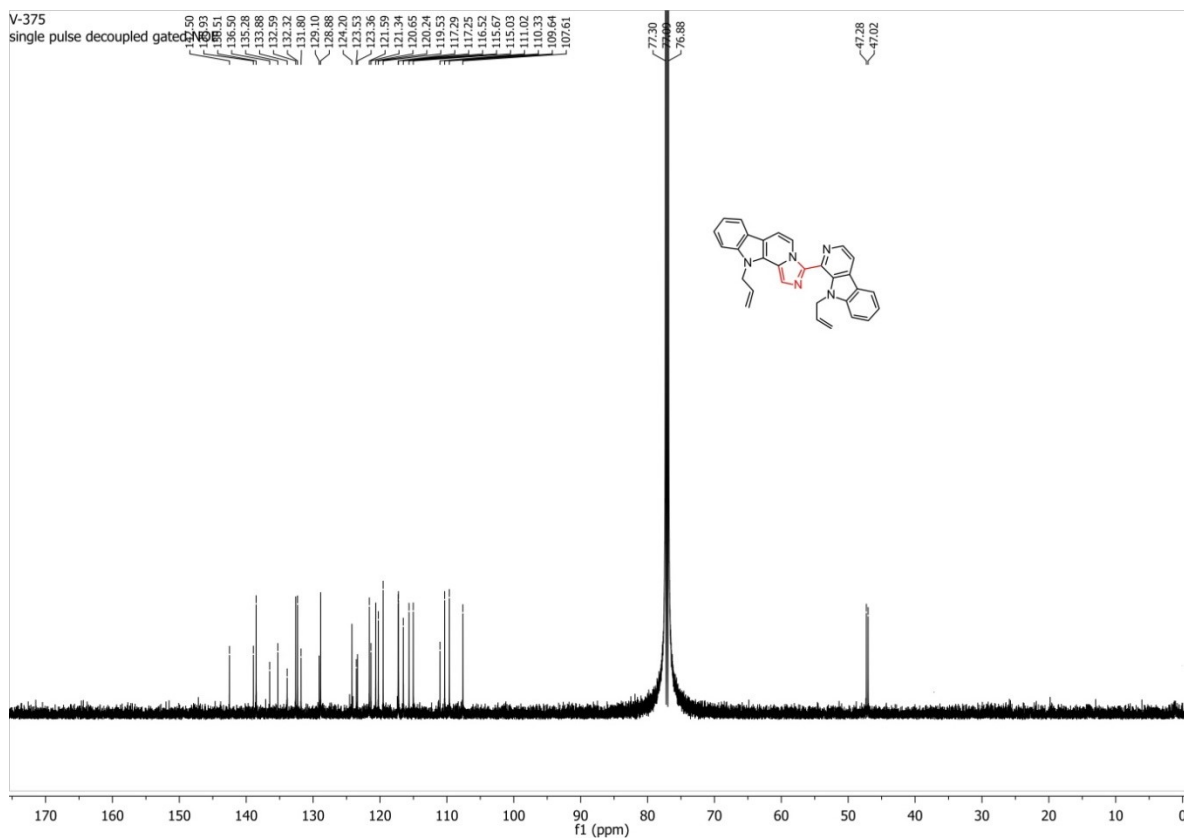

Figure S14.  $^{13}\text{C}$ -NMR spectrum of 15E.

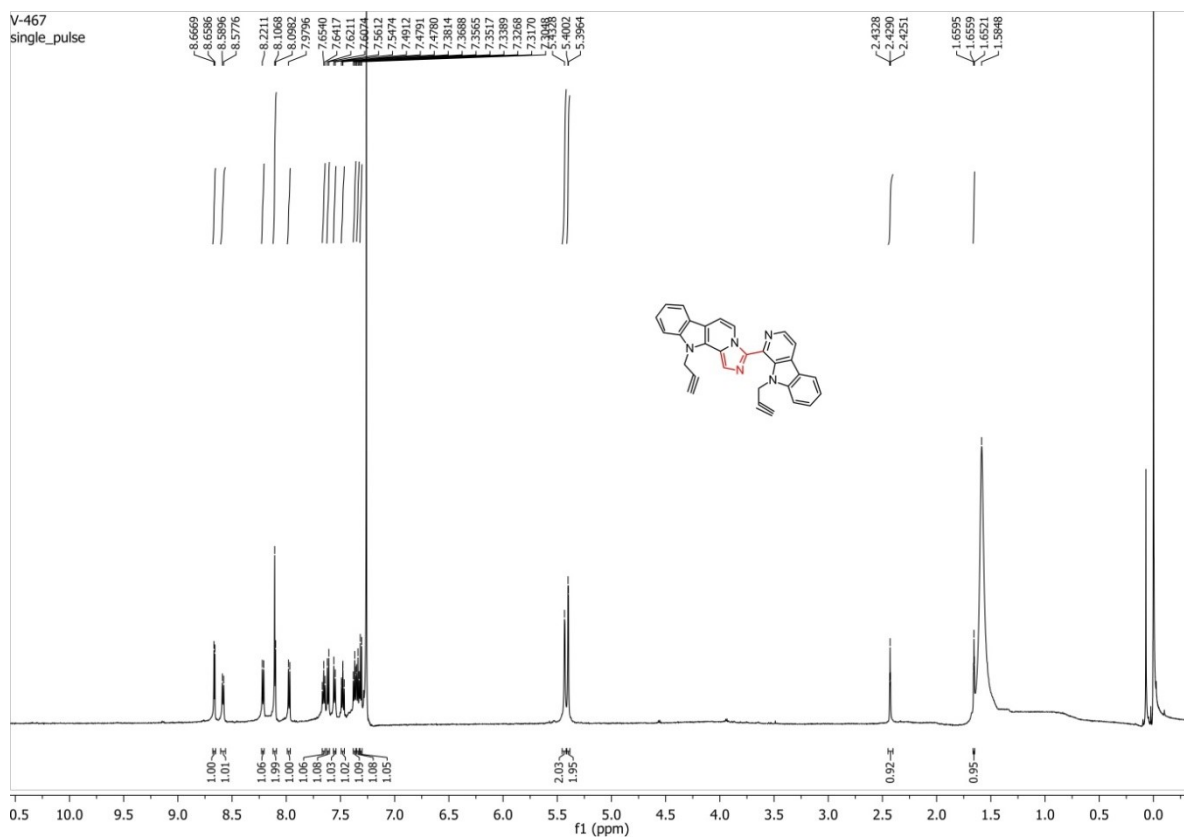

Figure S15.  $^1\text{H}$ -NMR spectrum of 15F.

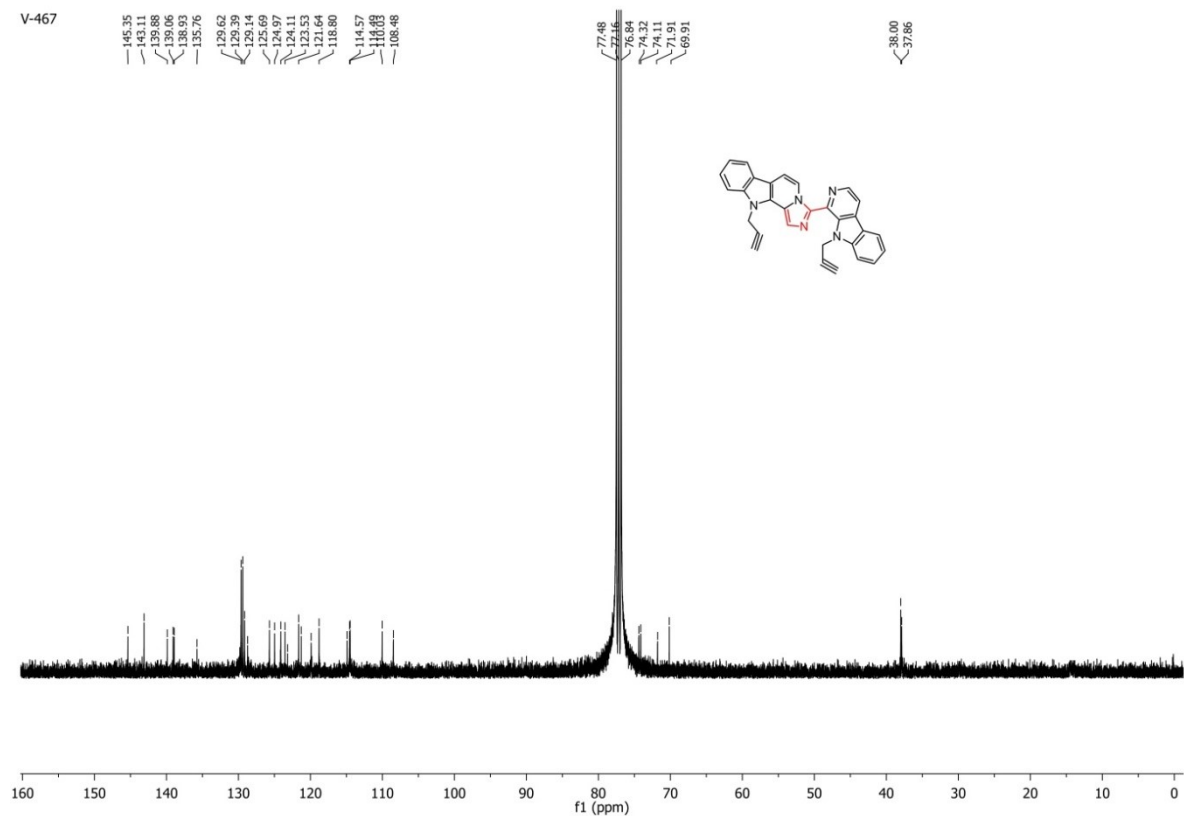

Figure S16.  $^{13}\text{C}$ -NMR spectrum of 15F.

V-467

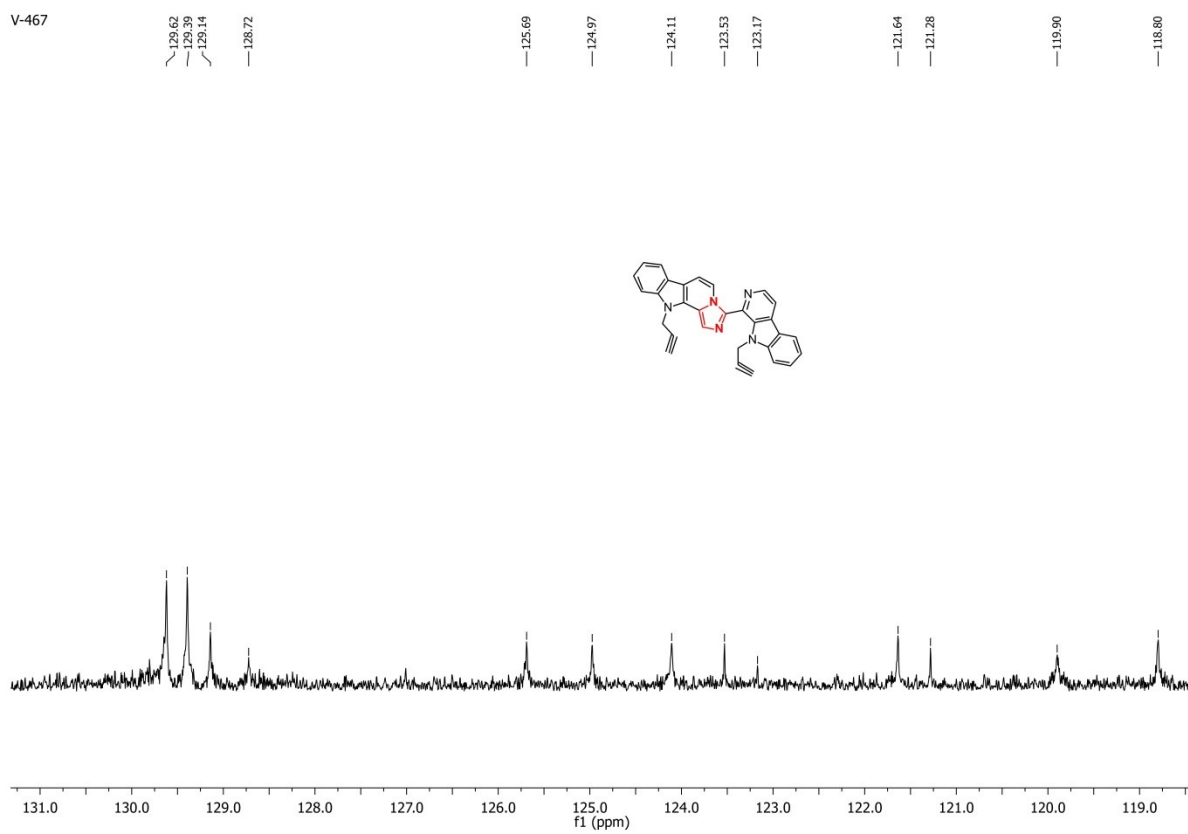

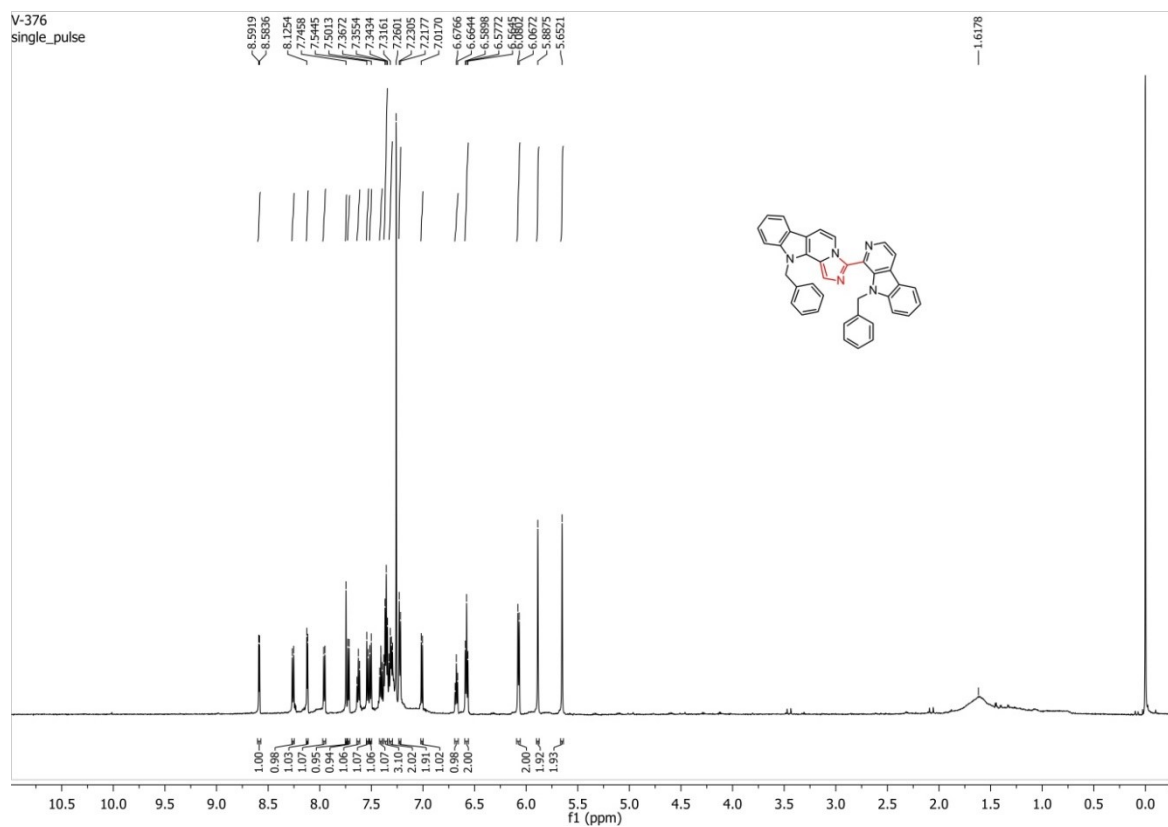

**Figure S18.**  $^1\text{H}$ -NMR spectrum of **15G**.

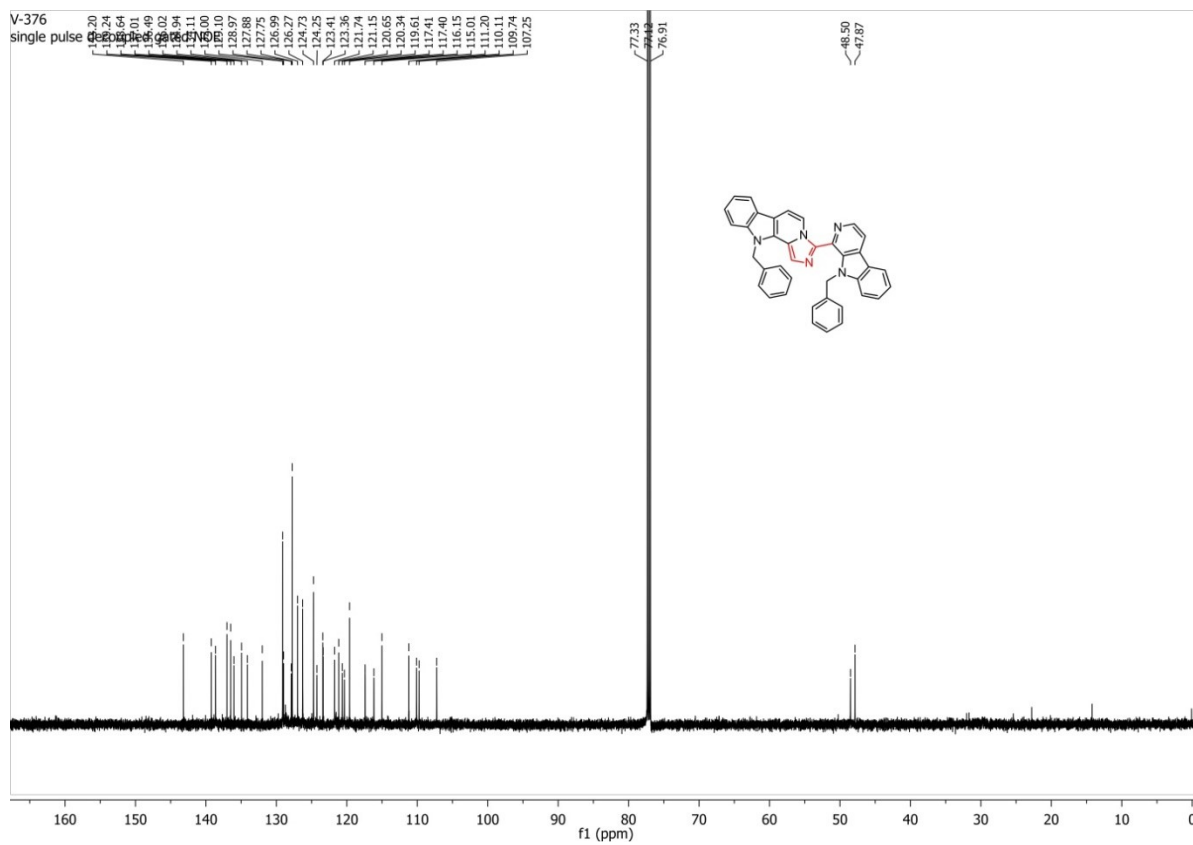

**Figure S19.**  $^{13}\text{C}$ -NMR spectrum of **15G**.

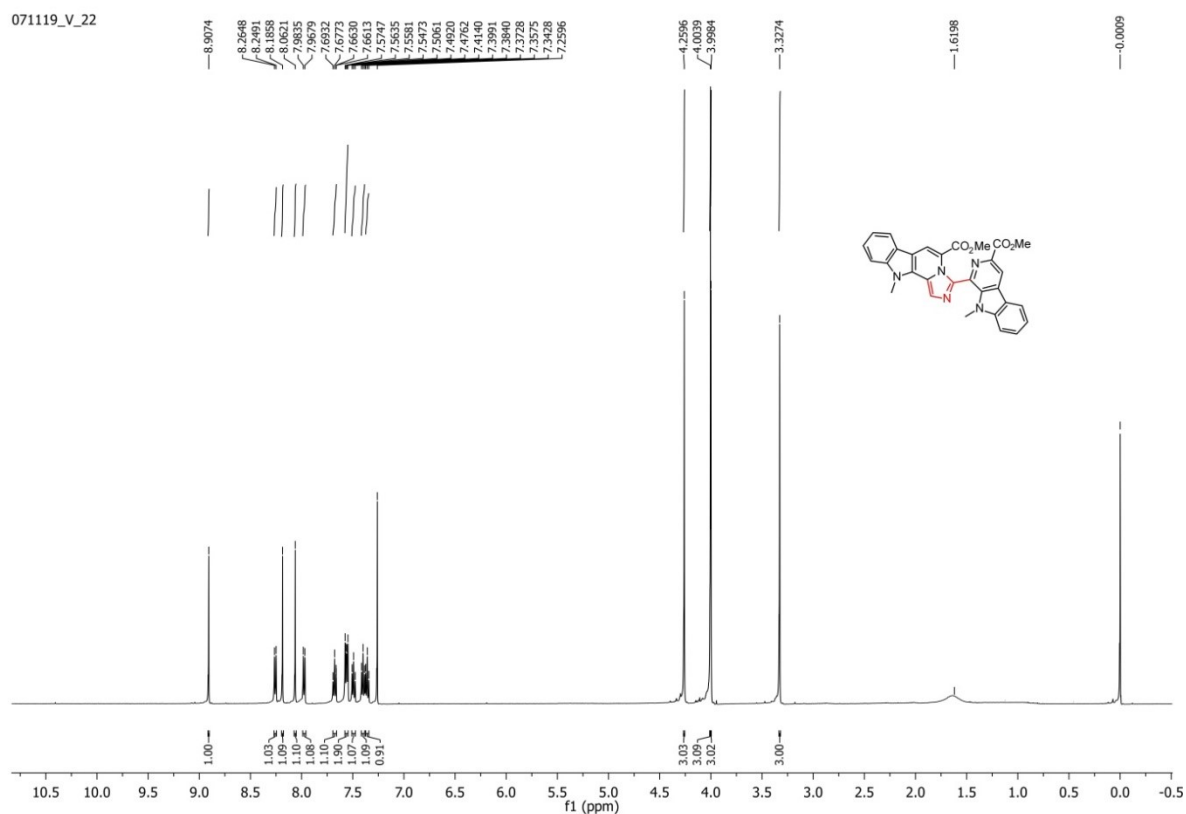

Figure S20.  $^1\text{H-NMR}$  spectrum of 16A.

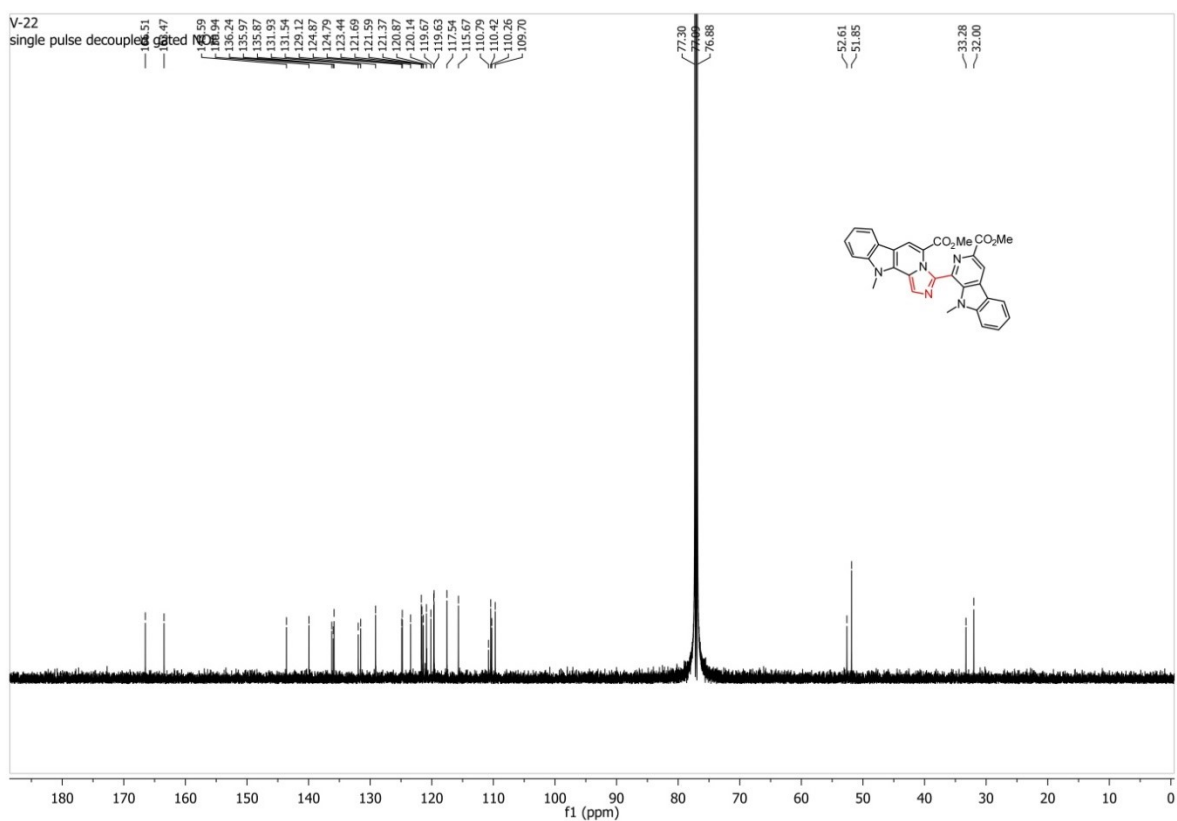

Figure S21.  $^{13}\text{C-NMR}$  spectrum of 16A.

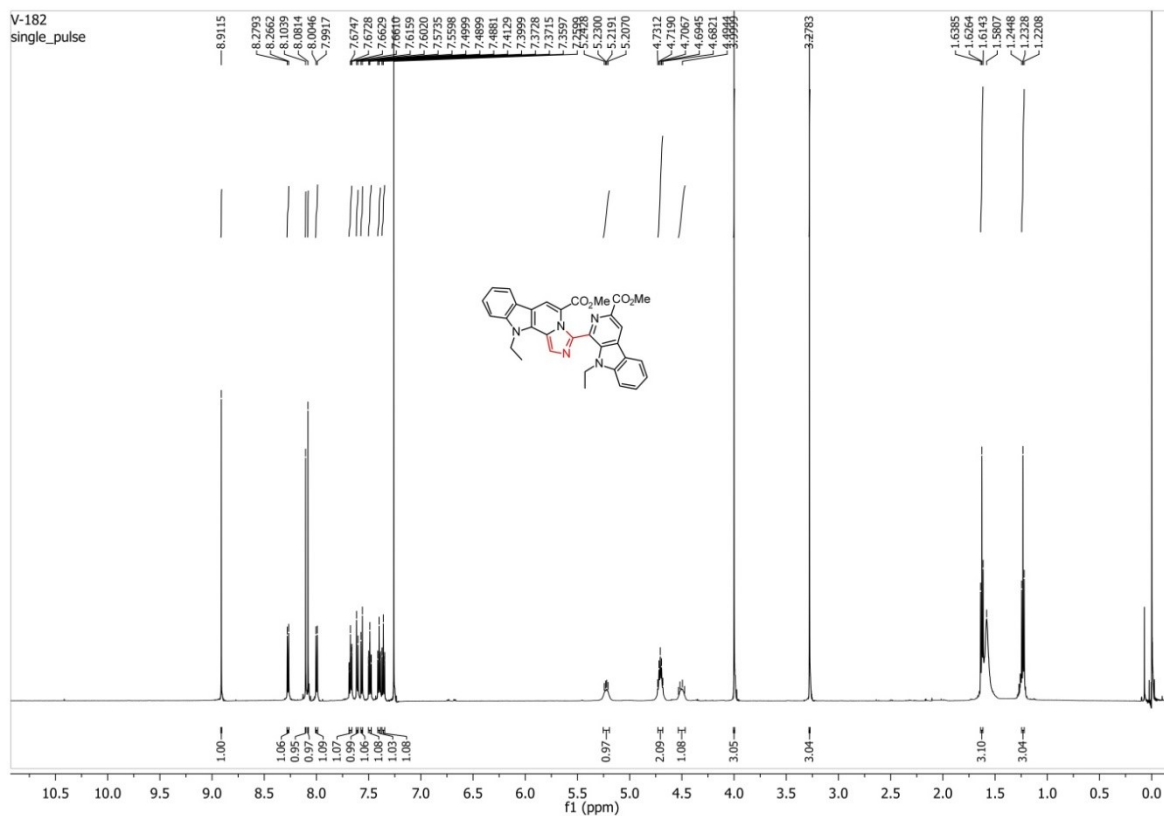

Figure S22.  $^1\text{H-NMR}$  spectrum of **16B**.

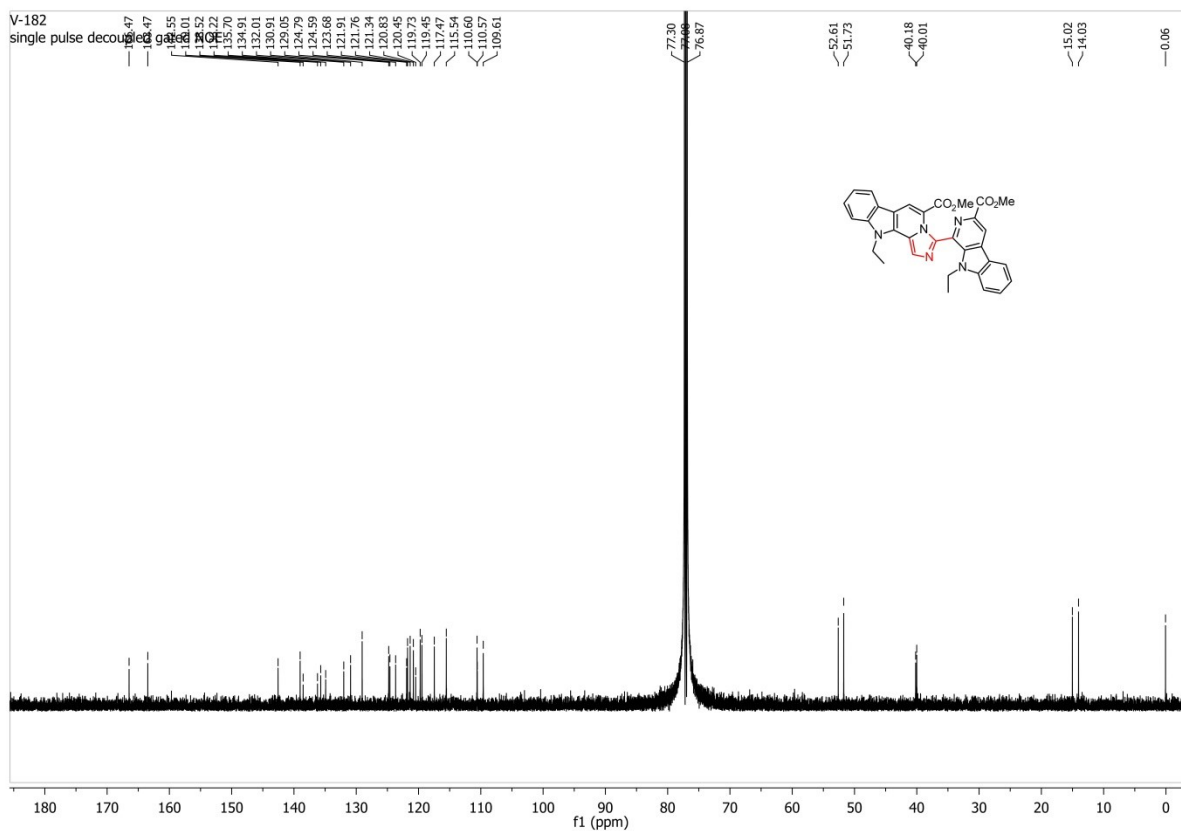

Figure S23.  $^{13}\text{C-NMR}$  spectrum of **16B**.

171220\_V\_183

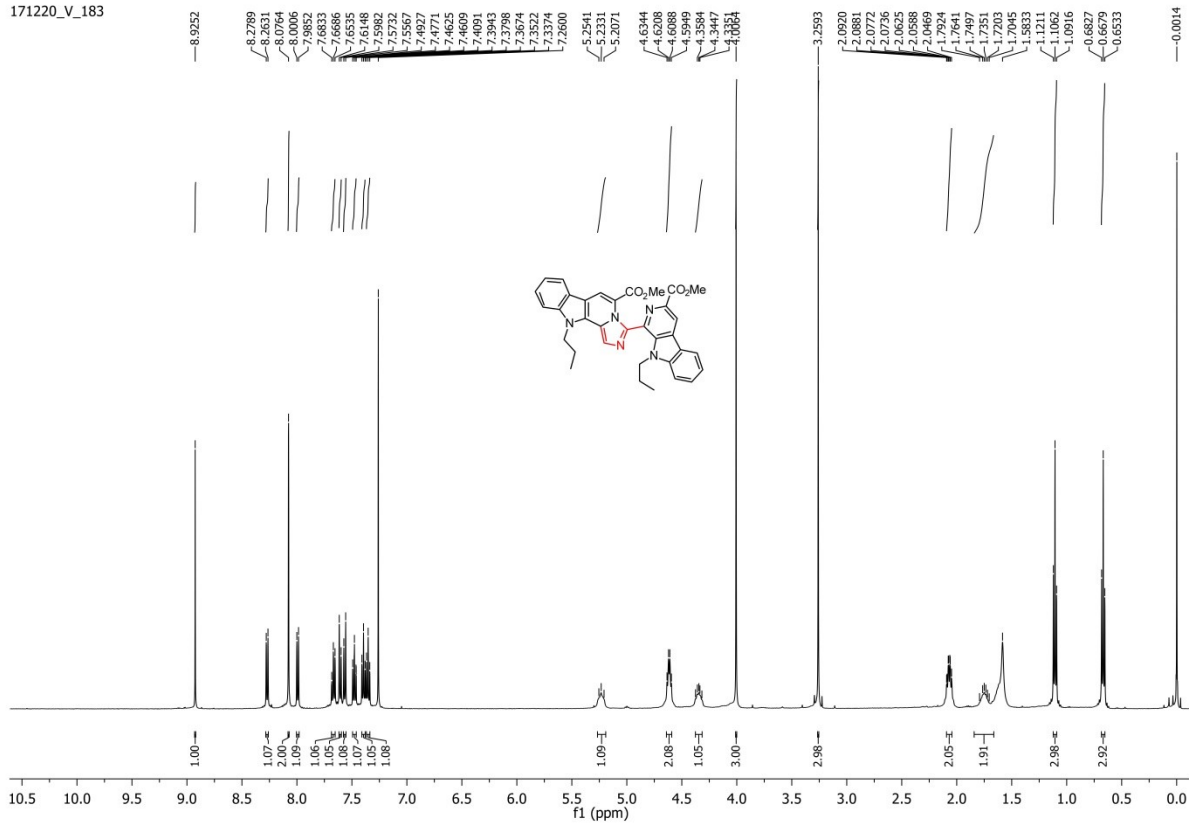Figure S24. <sup>1</sup>H-NMR spectrum of 16C.

171220\_V\_183B

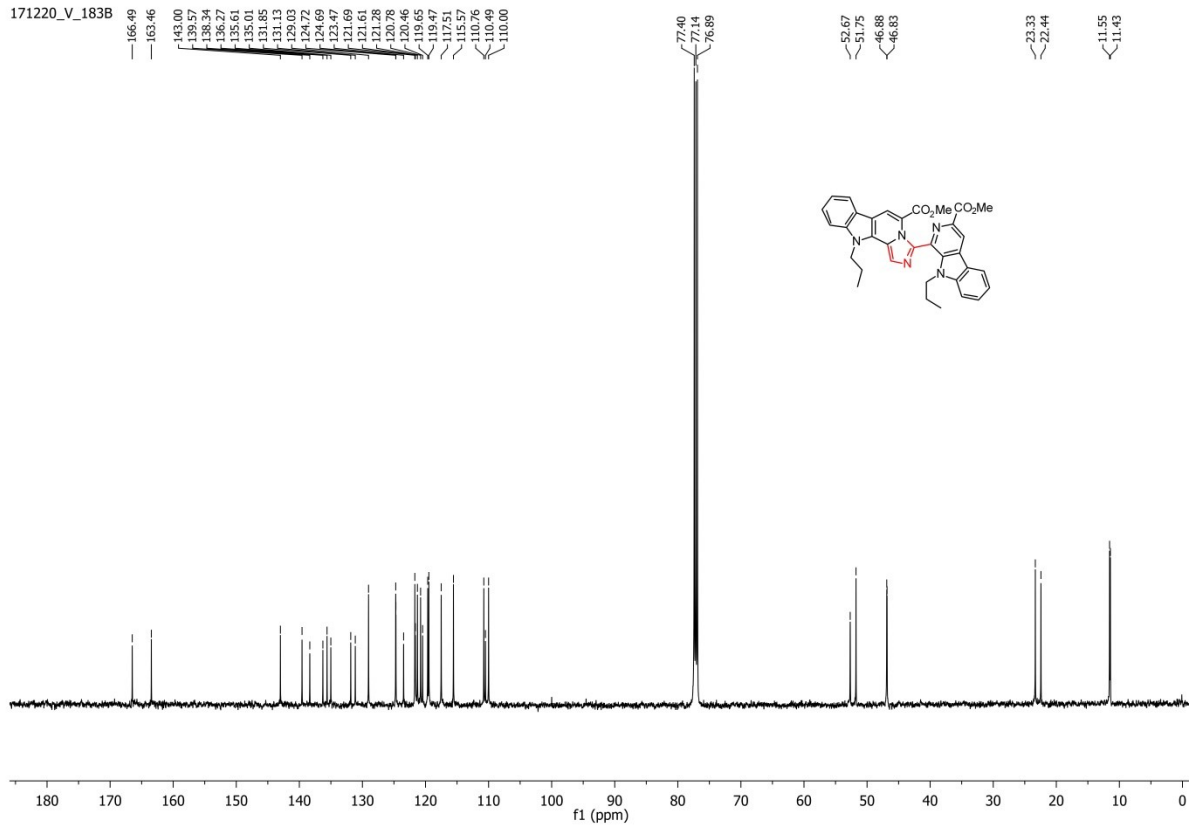Figure S25. <sup>13</sup>C-NMR spectrum of 16C.

171220\_V\_185

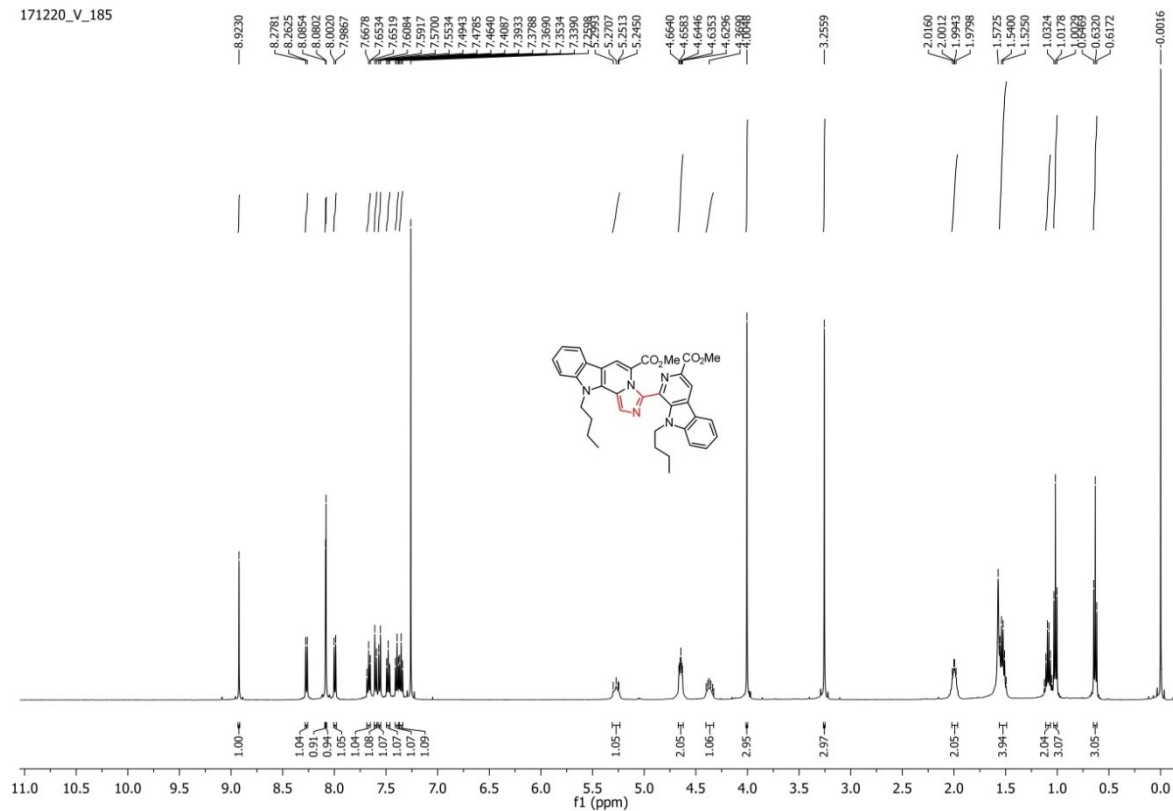

Figure S26. <sup>1</sup>H-NMR spectrum of 16D.

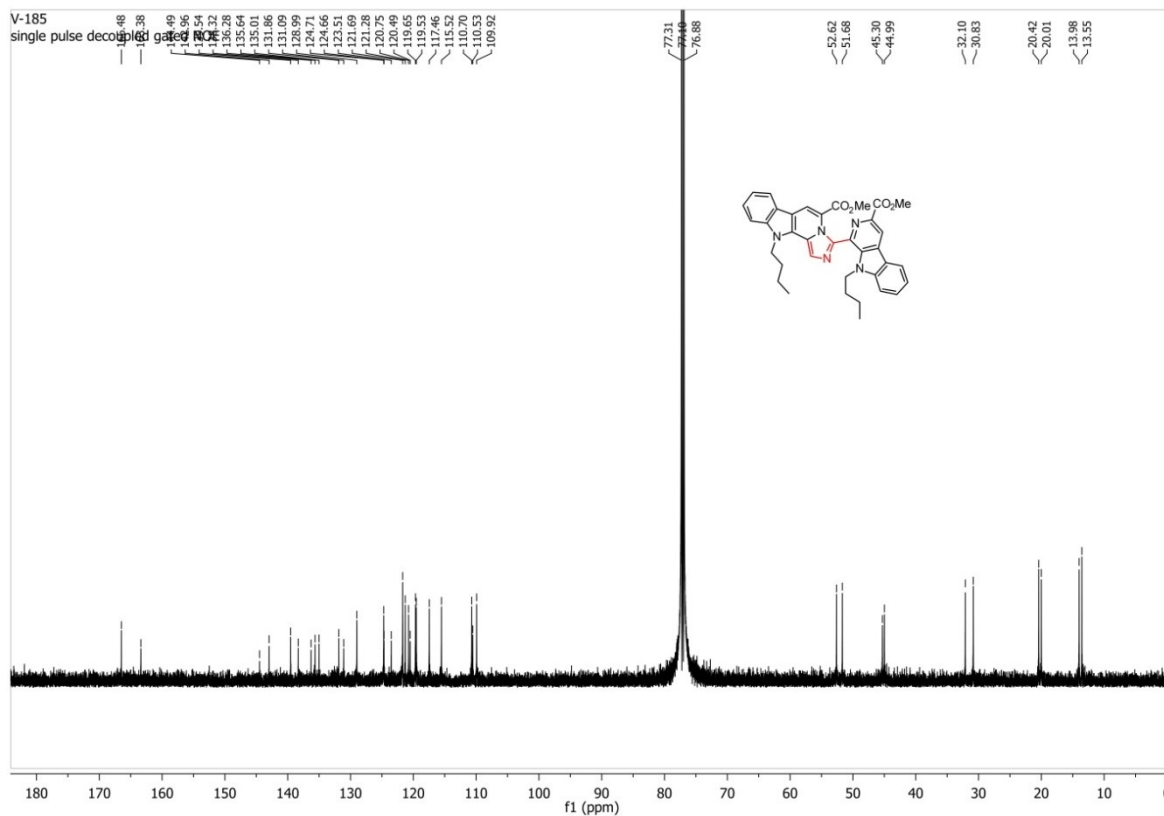

Figure S27. <sup>13</sup>C-NMR spectrum of 16D.



220221\_V\_186

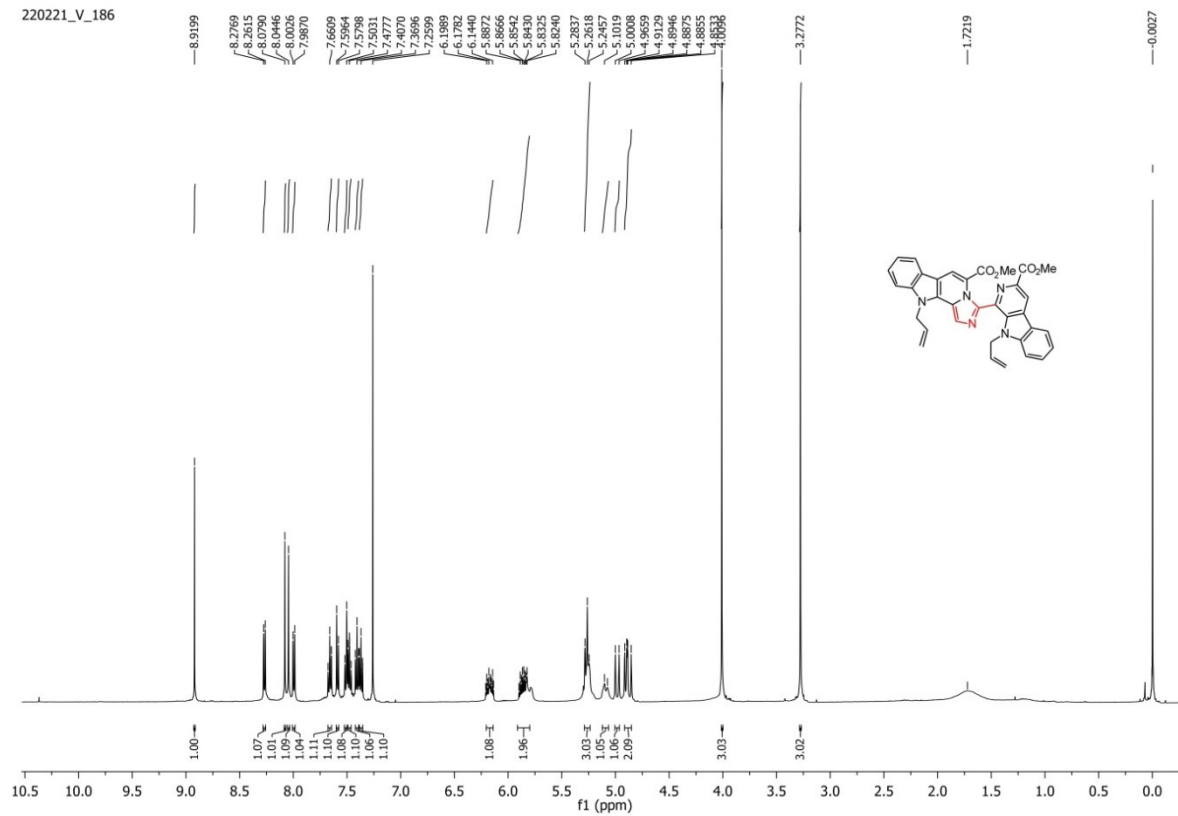Figure S28. <sup>1</sup>H-NMR spectrum of 16E.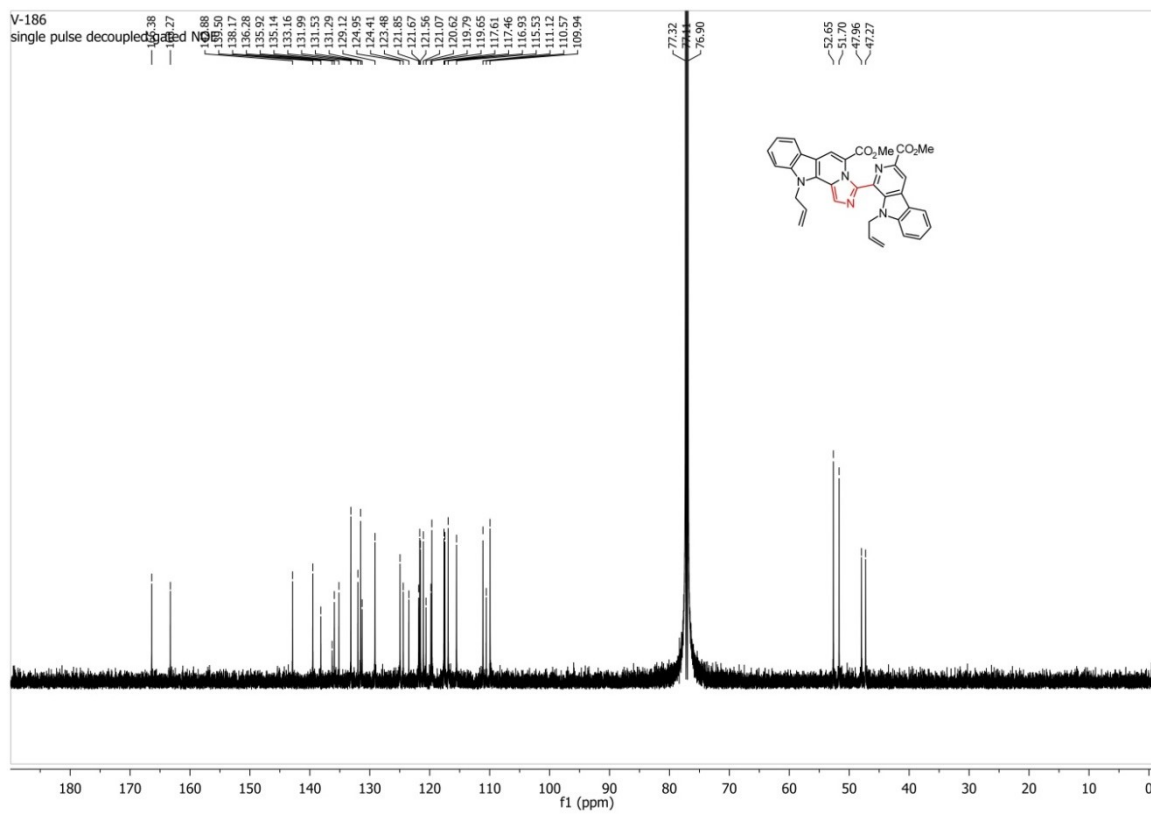Figure S29. <sup>13</sup>C-NMR spectrum of 16E.

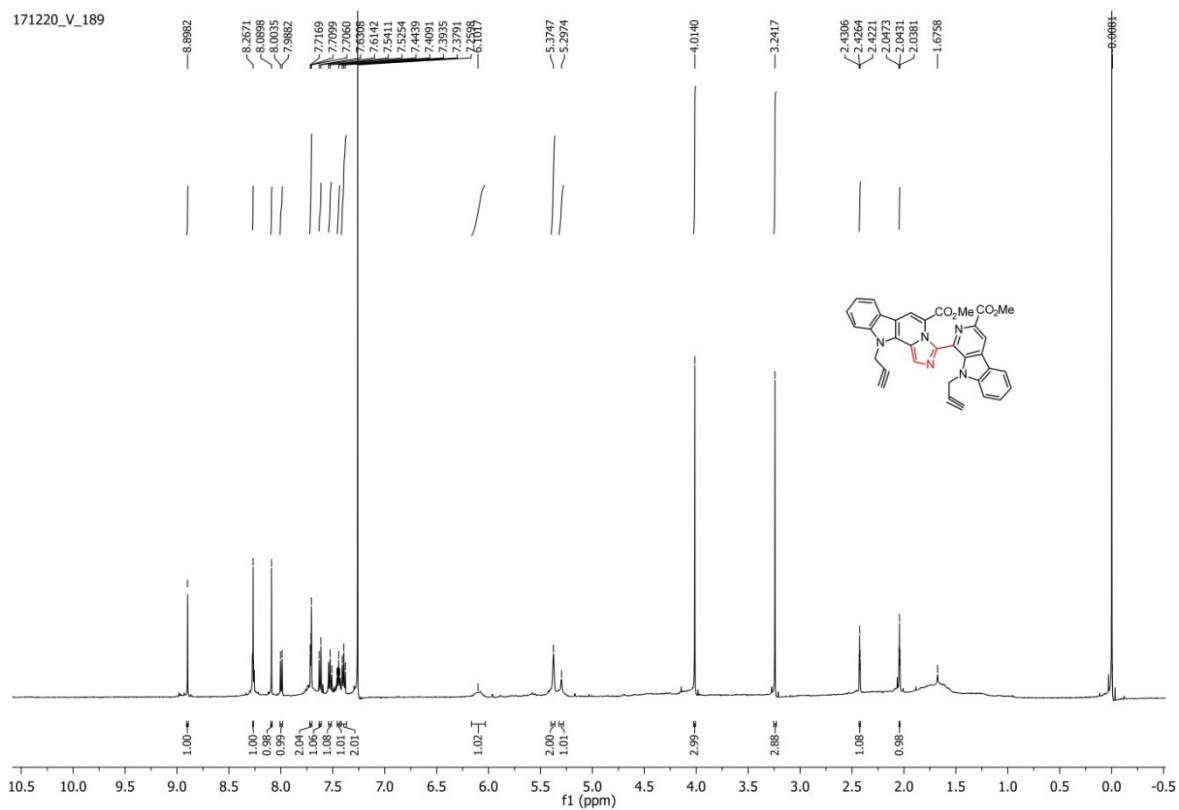

Figure S30. <sup>1</sup>H-NMR spectrum of 16F.

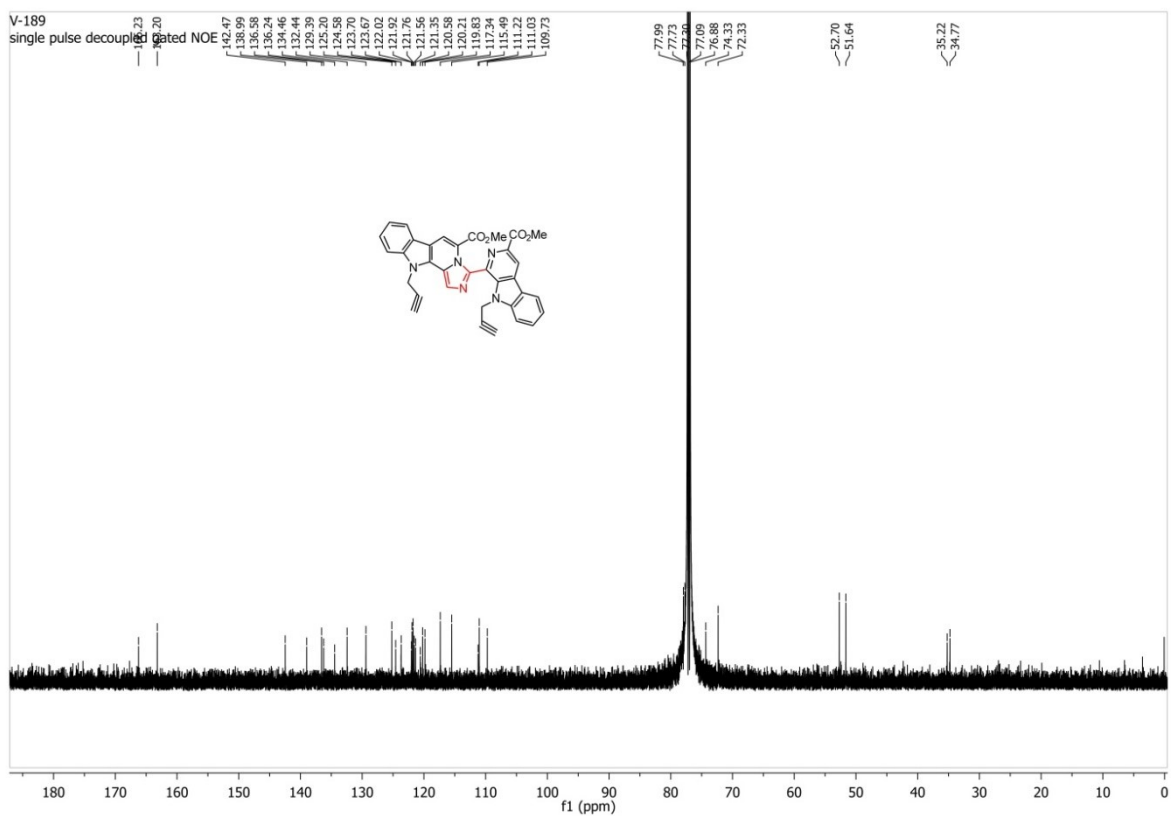

Figure S31. <sup>13</sup>C-NMR spectrum of 16F.

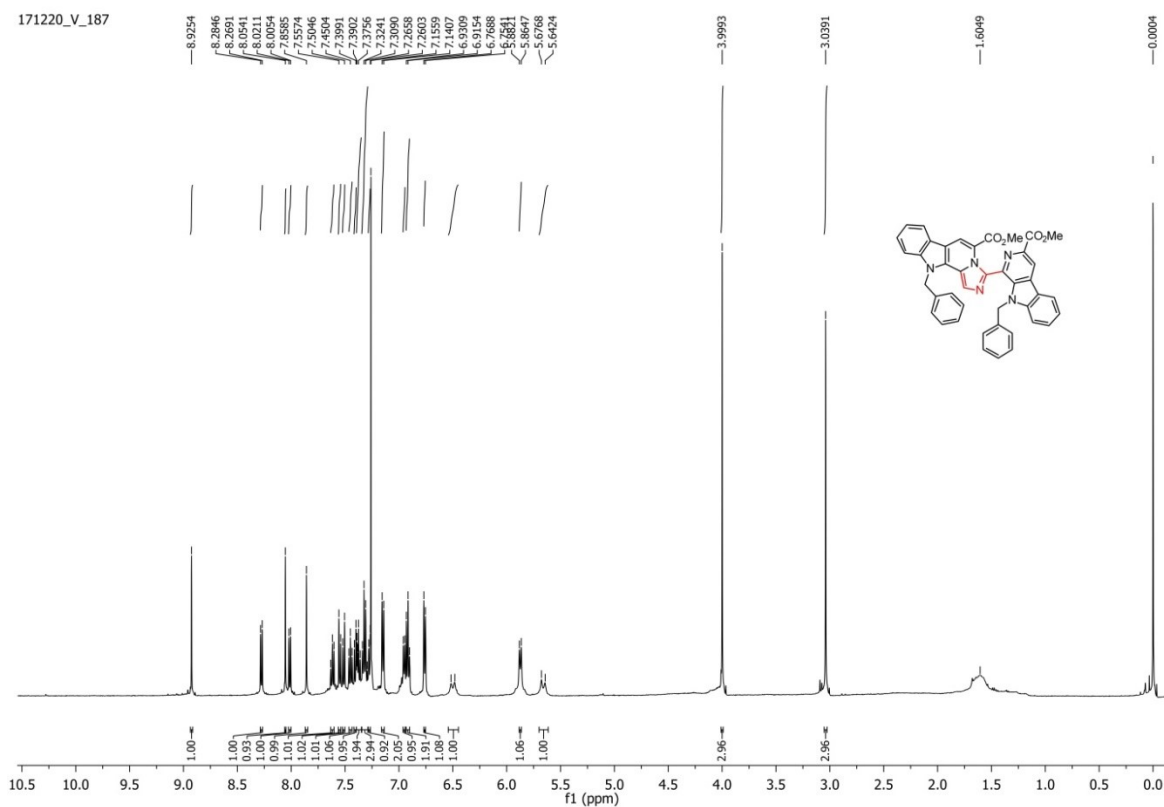

Figure S32.  $^1\text{H}$ -NMR spectrum of 16G.

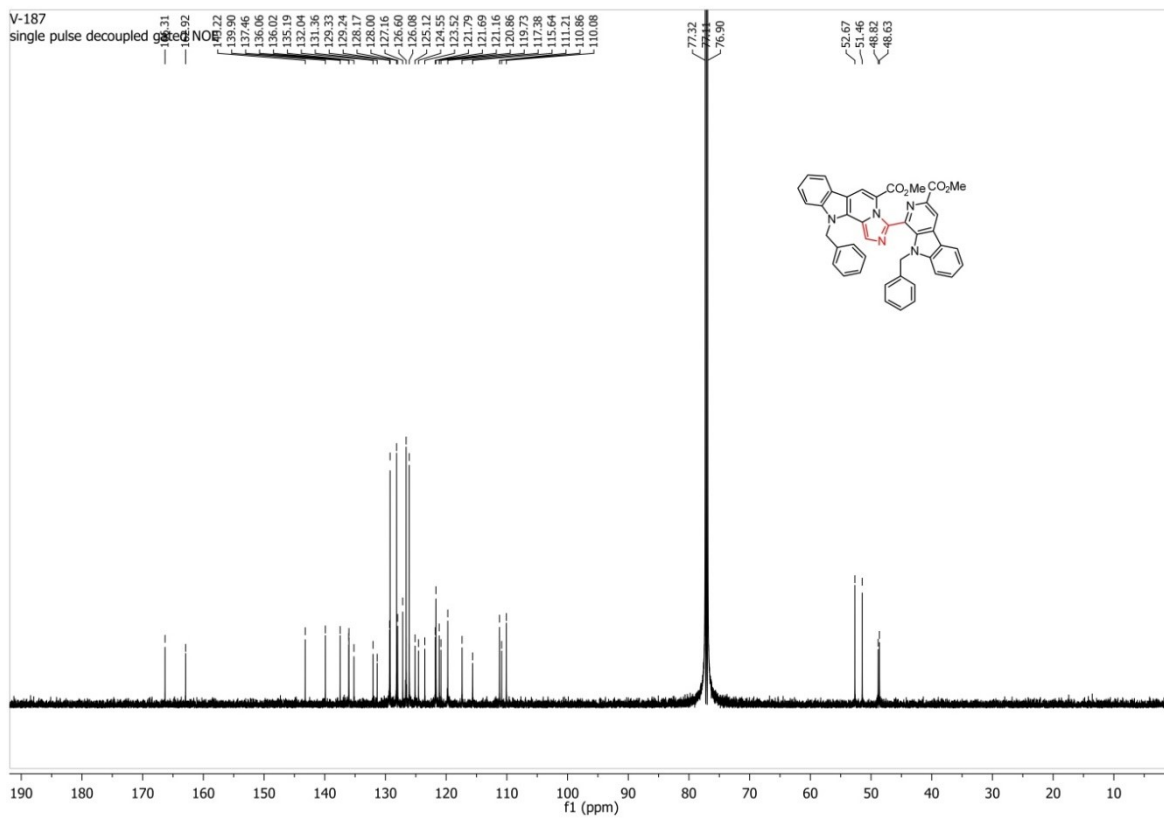

Figure S33.  $^{13}\text{C}$ -NMR spectrum of 16G.

220221\_V\_201

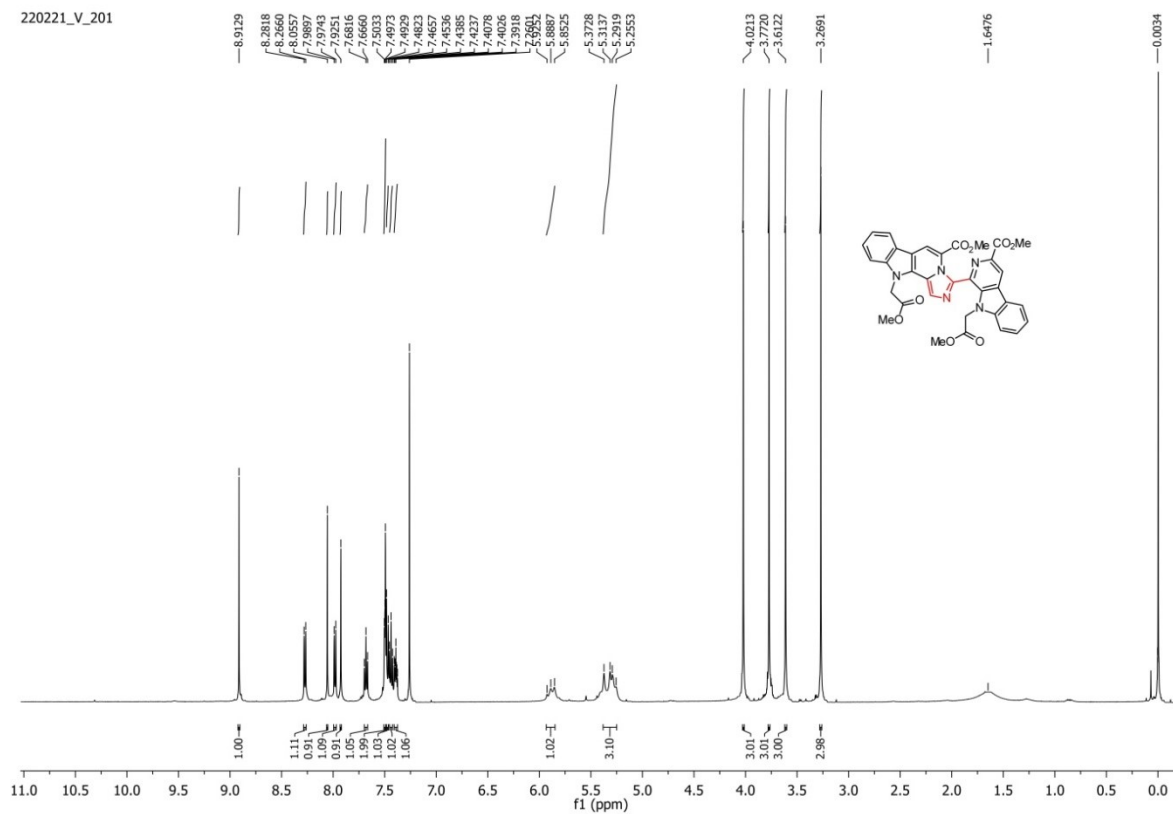Figure S34. <sup>1</sup>H-NMR spectrum of 16H.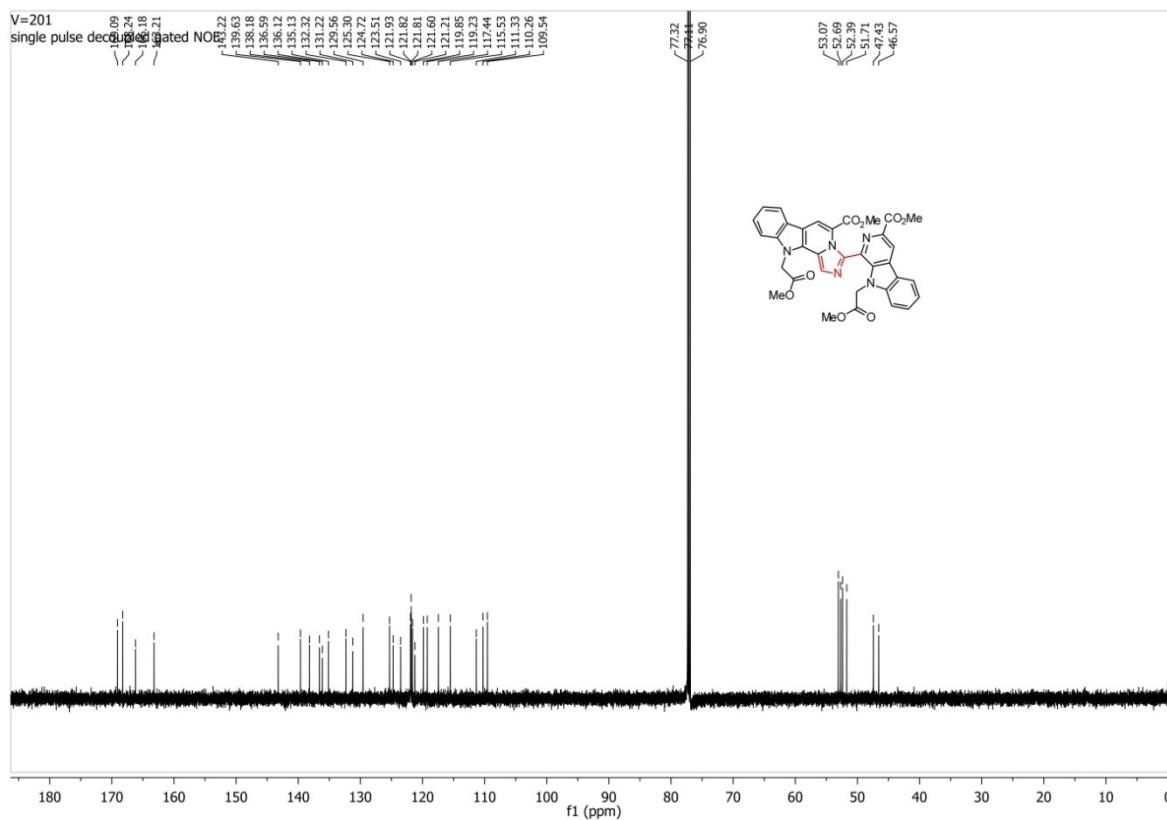Figure S35. <sup>13</sup>C-NMR spectrum of 16H.

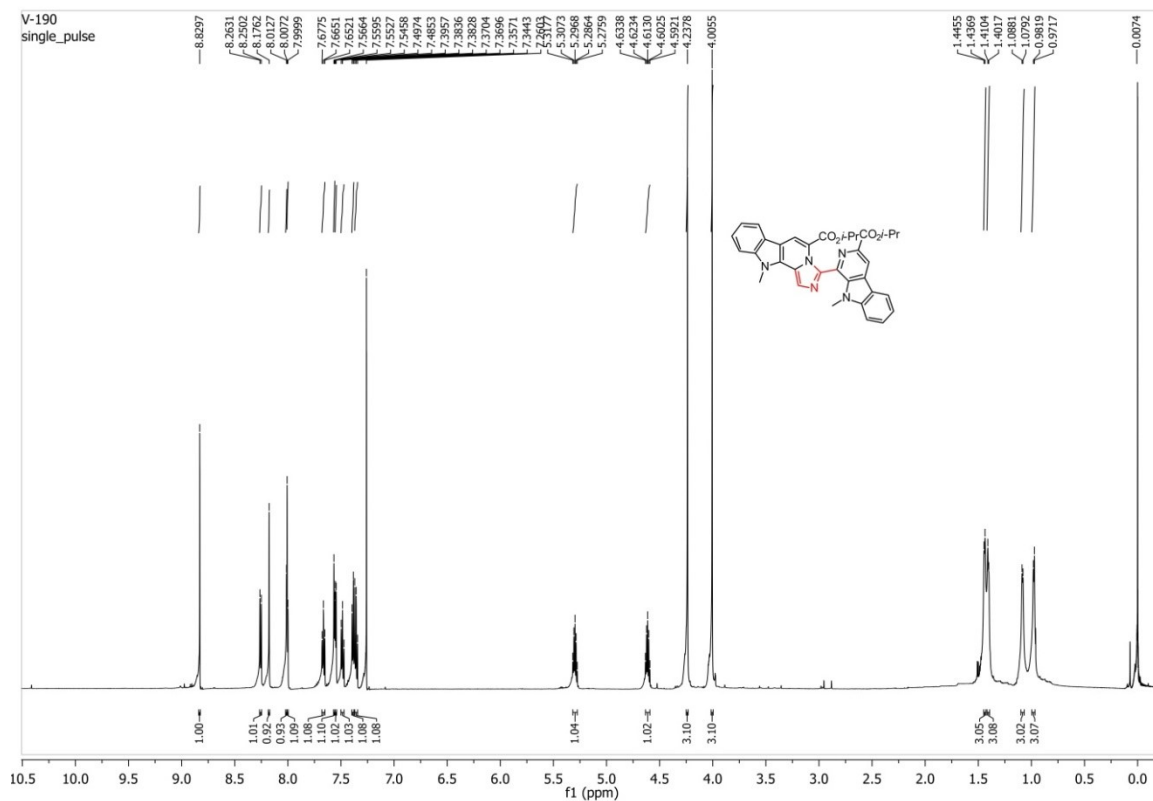

Figure S36. <sup>1</sup>H-NMR spectrum of 17A.

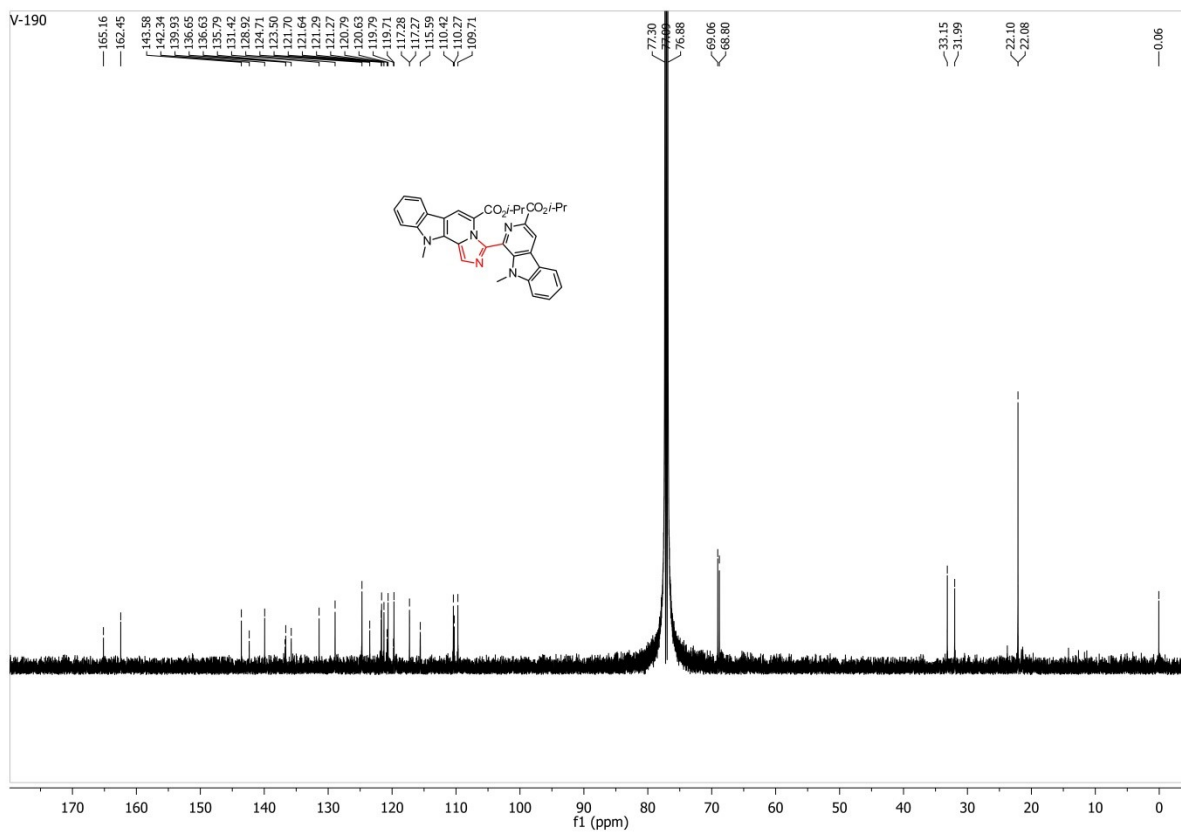

Figure S37. <sup>13</sup>C-NMR spectrum of 17A.

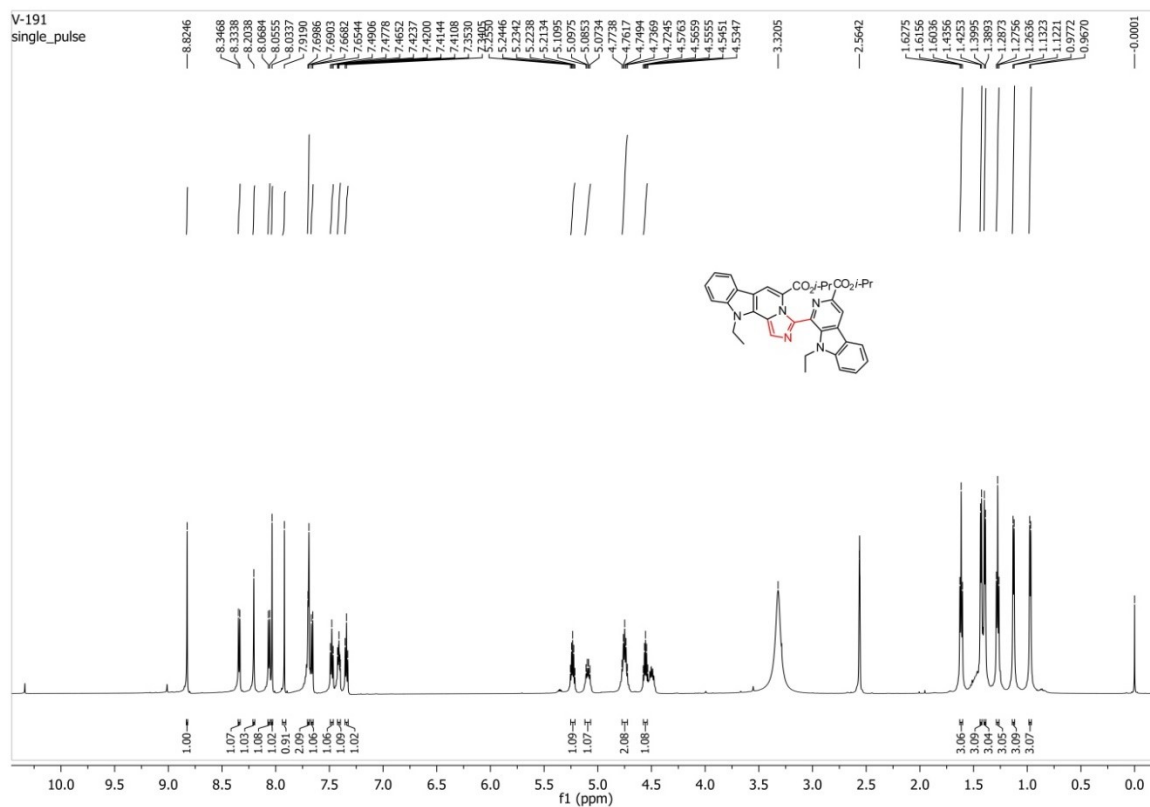

Figure S38. <sup>1</sup>H-NMR spectrum of 17B.

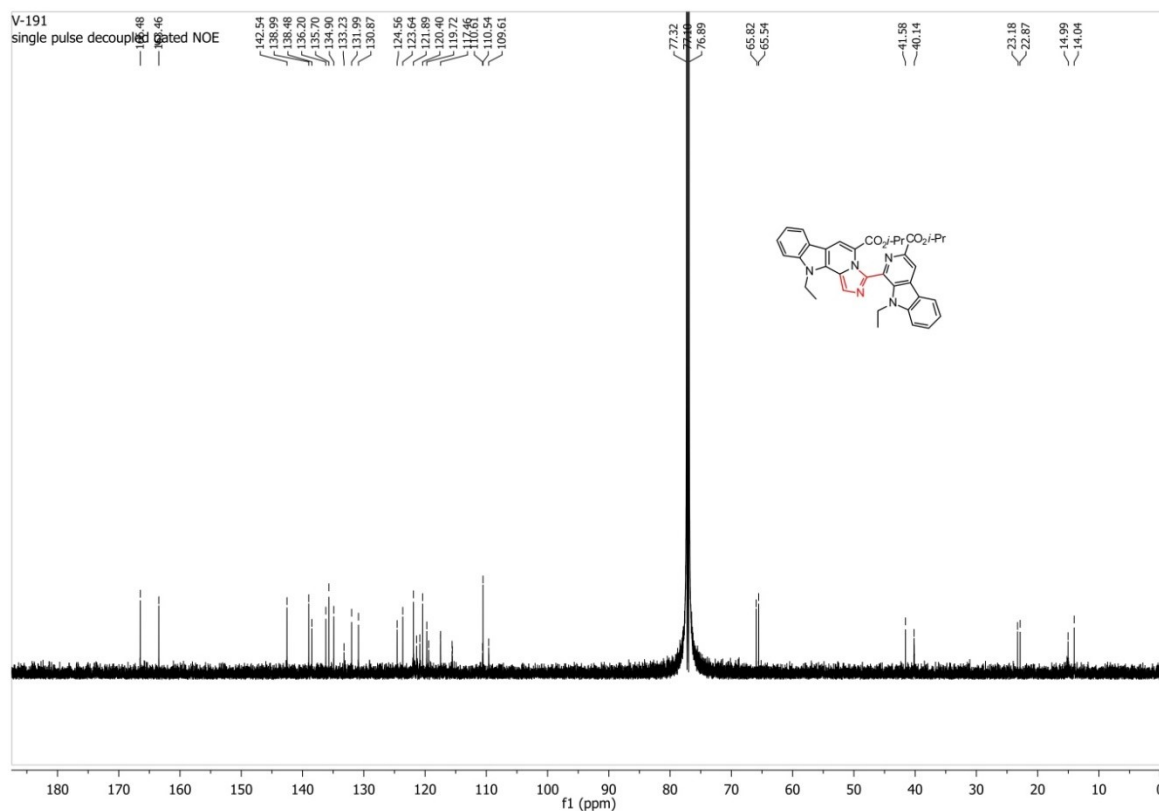

Figure S39. <sup>13</sup>C-NMR spectrum of 17B.

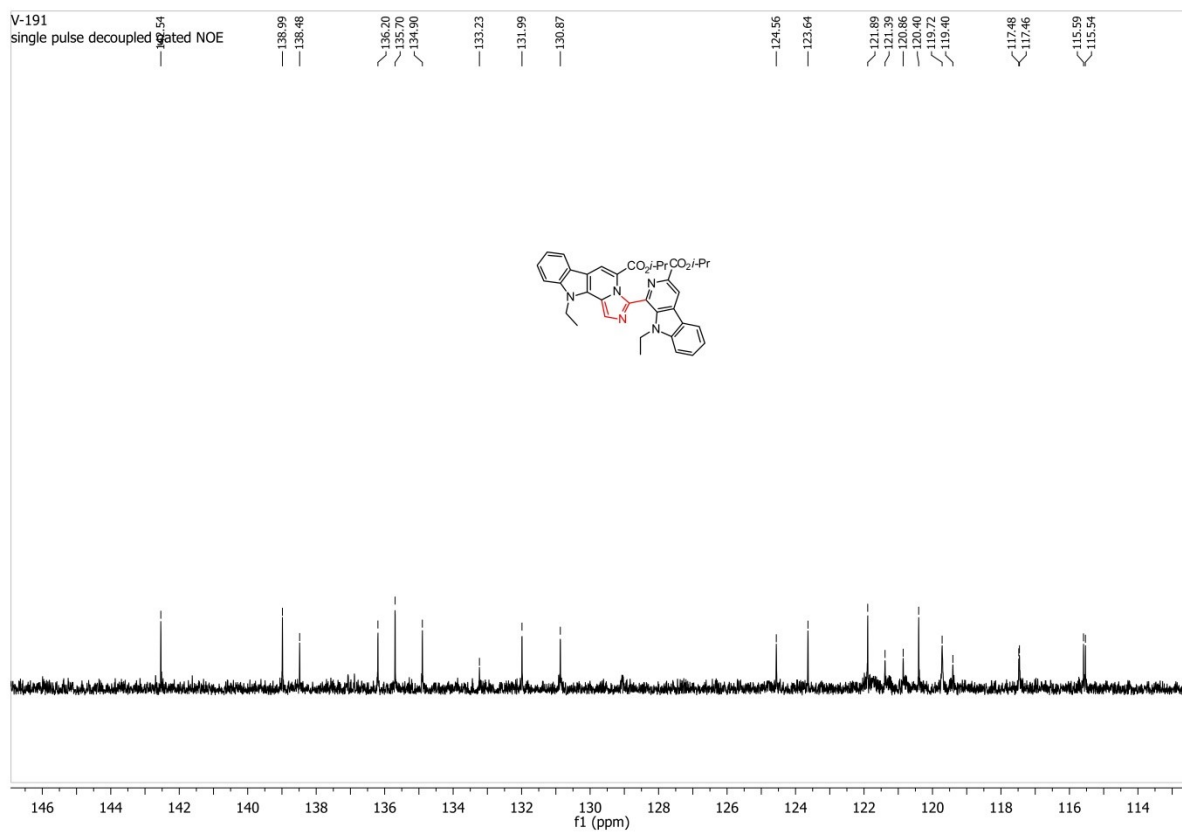

**Figure S40.** Extended  $^{13}\text{C}$ -NMR spectrum of **17B**.

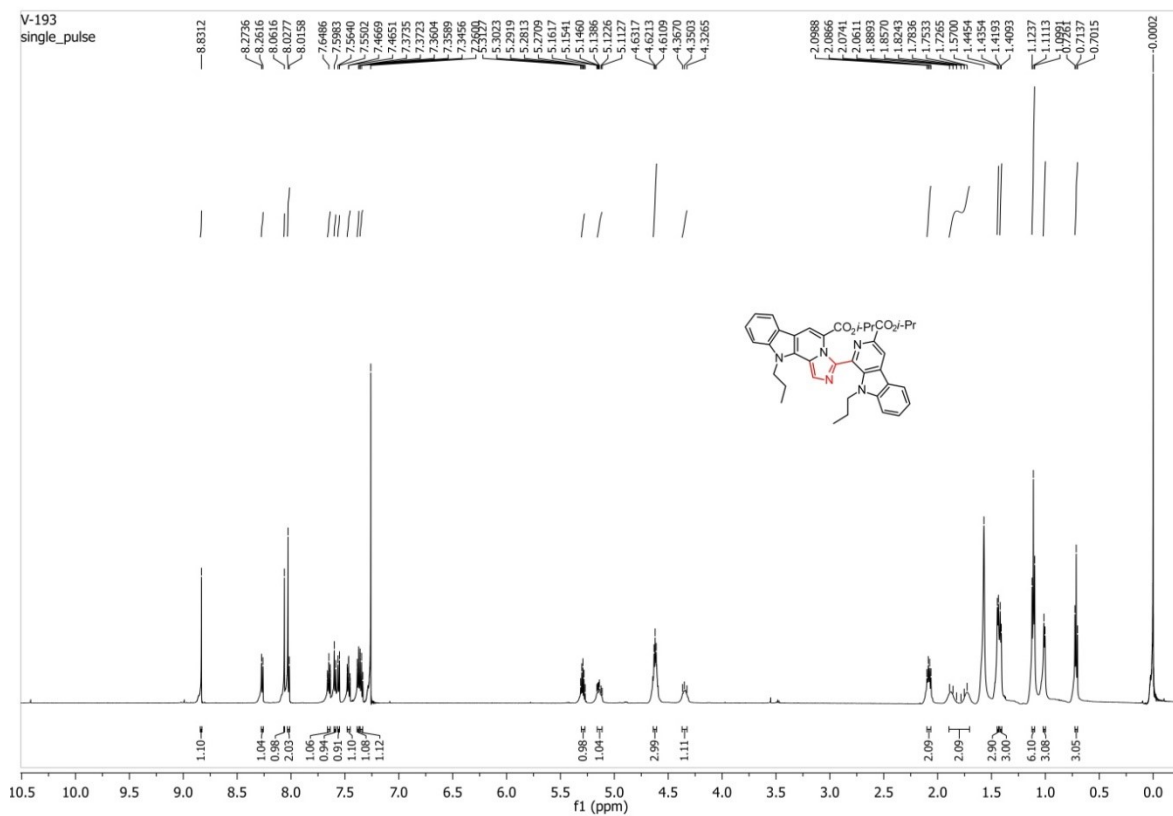

Figure S41. <sup>1</sup>H-NMR spectrum of 17C.

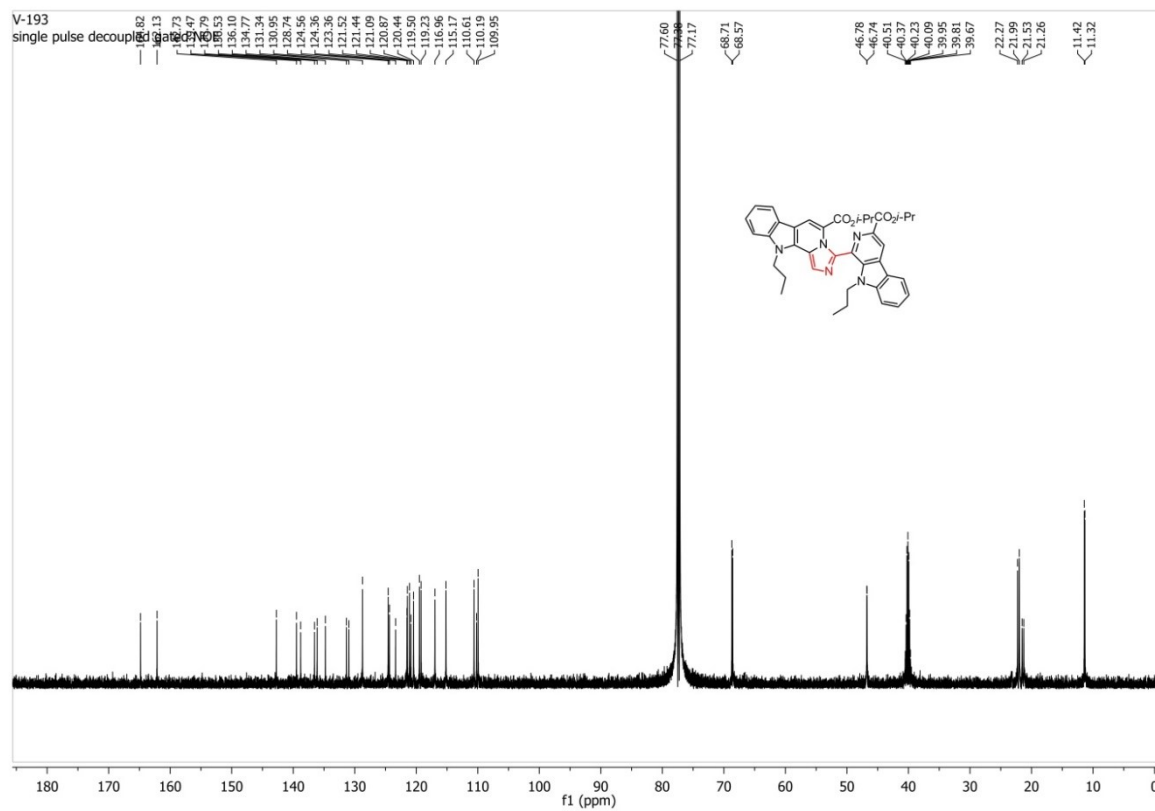

Figure S42. <sup>13</sup>C-NMR spectrum of 17C.



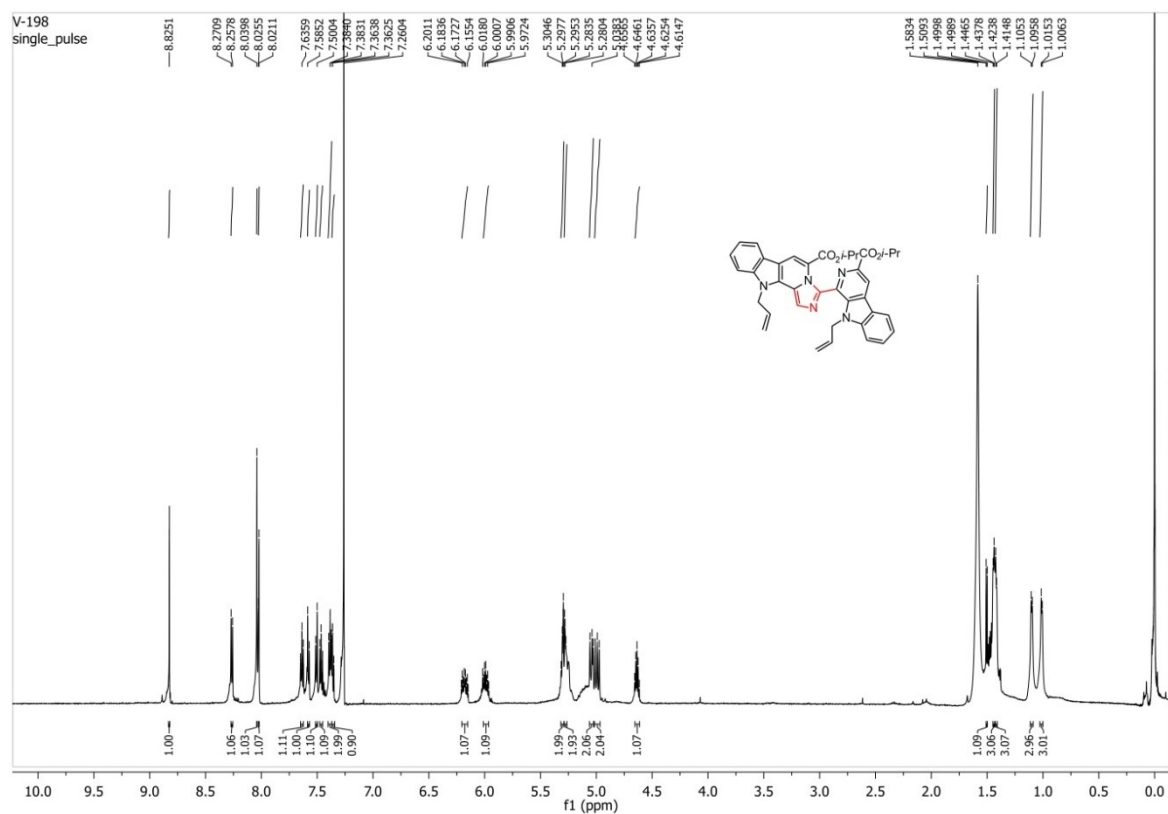

Figure S43.  $^1\text{H}$ -NMR spectrum of 17E.

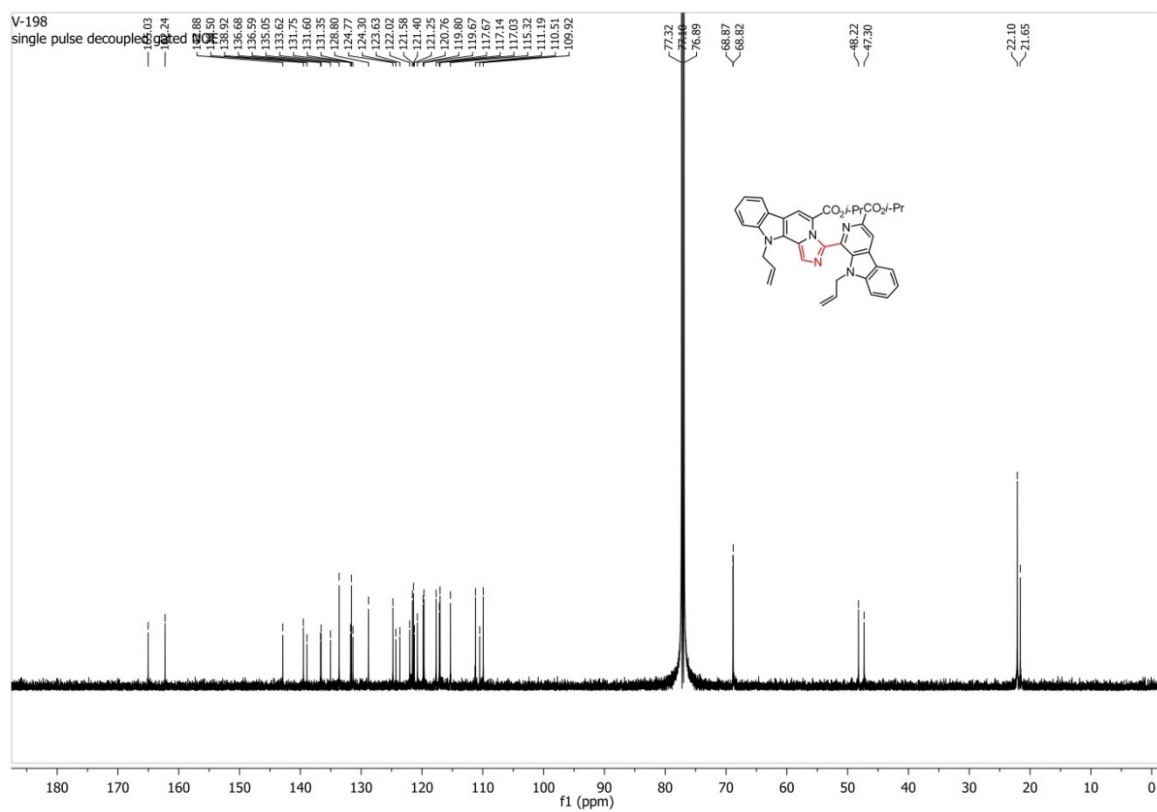

Figure S44.  $^{13}\text{C}$ -NMR spectrum of 17E.

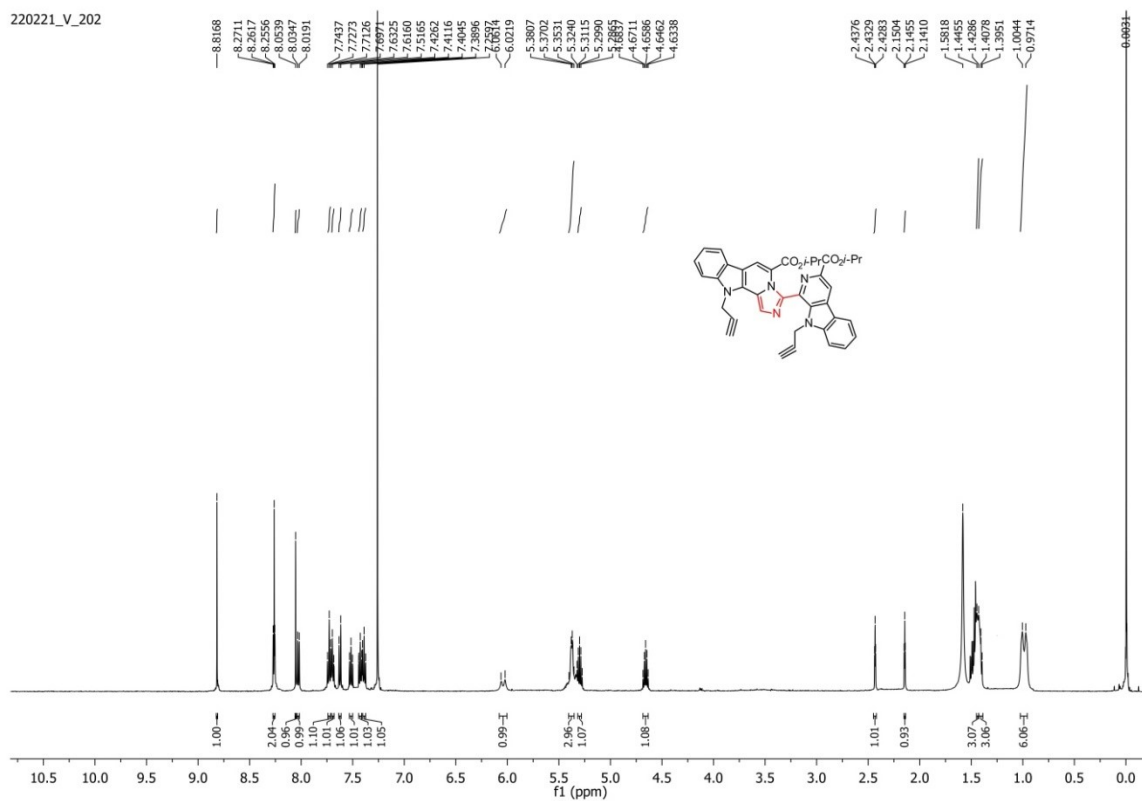

Figure S45. <sup>1</sup>H-NMR spectrum of 17F.

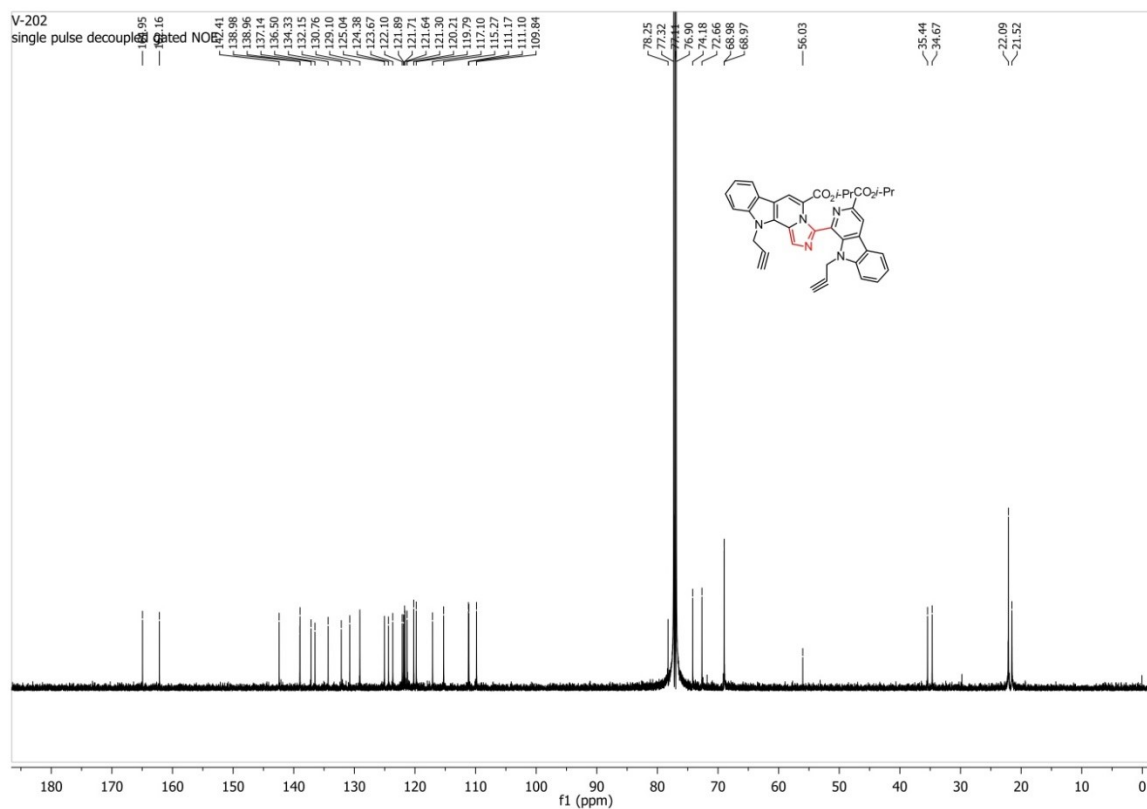

Figure S46. <sup>13</sup>C-NMR spectrum of 17F.

171220\_V\_199

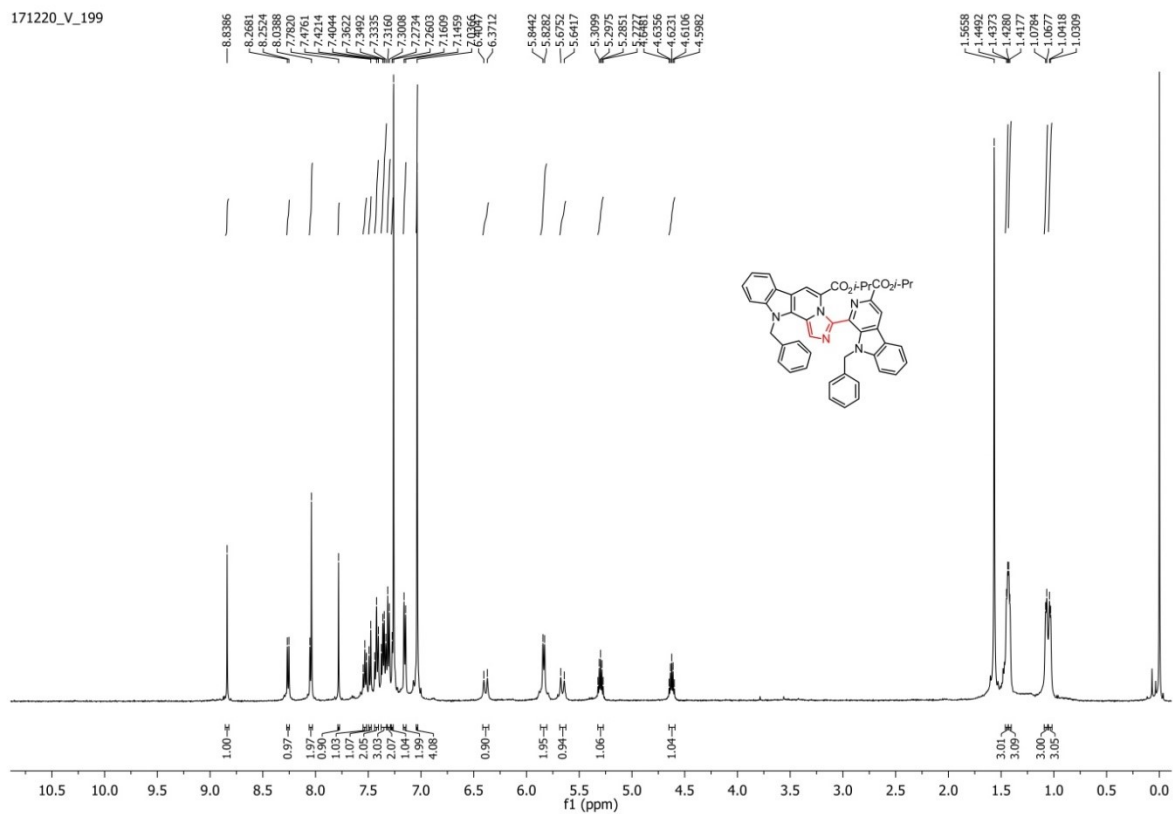Figure S47. <sup>1</sup>H-NMR spectrum of 17G.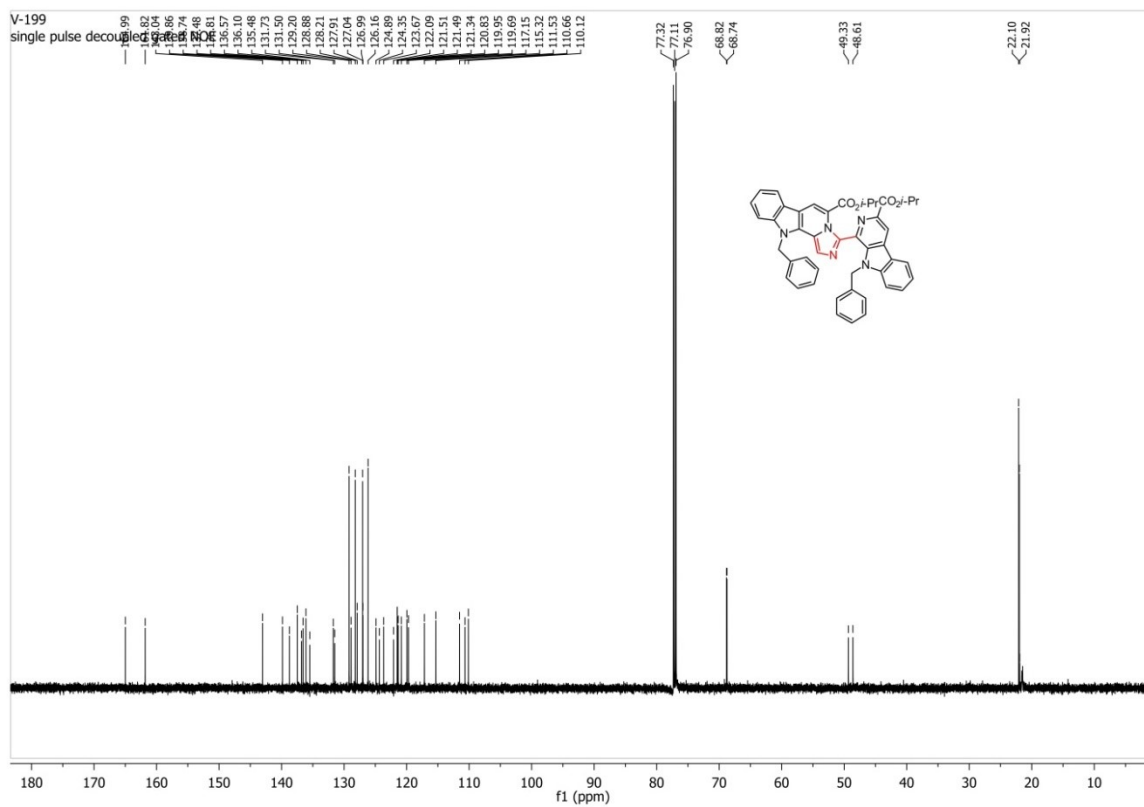Figure S48. <sup>13</sup>C-NMR spectrum of 17G.

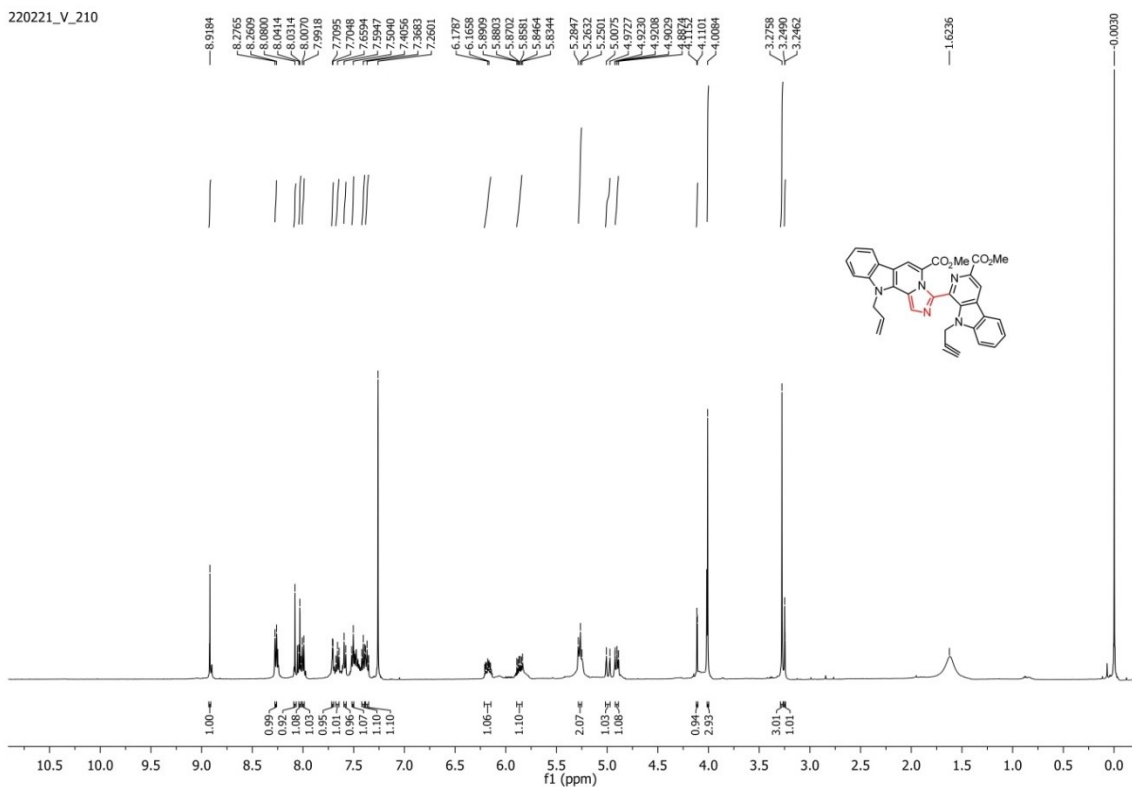

Figure S49.  $^1\text{H}$ -NMR spectrum of 18.

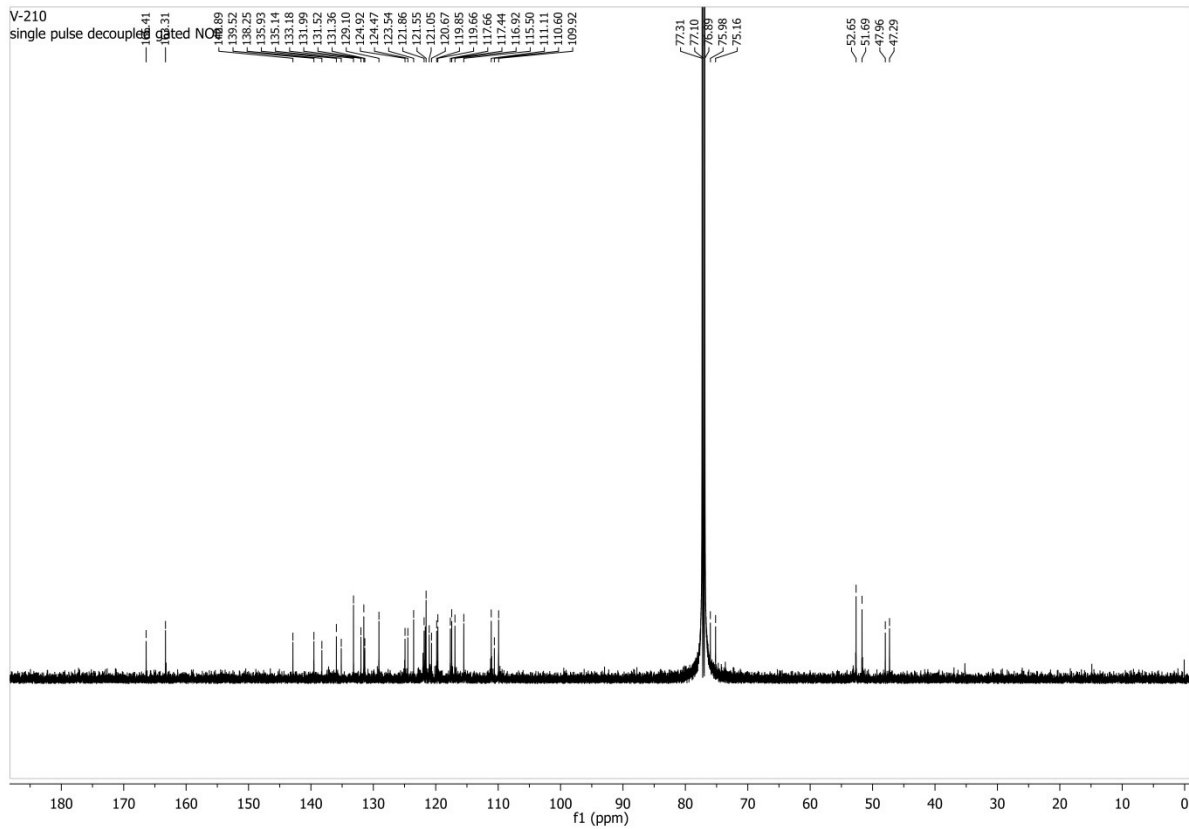

Figure S50.  $^{13}\text{C}$ -NMR spectrum of 18.

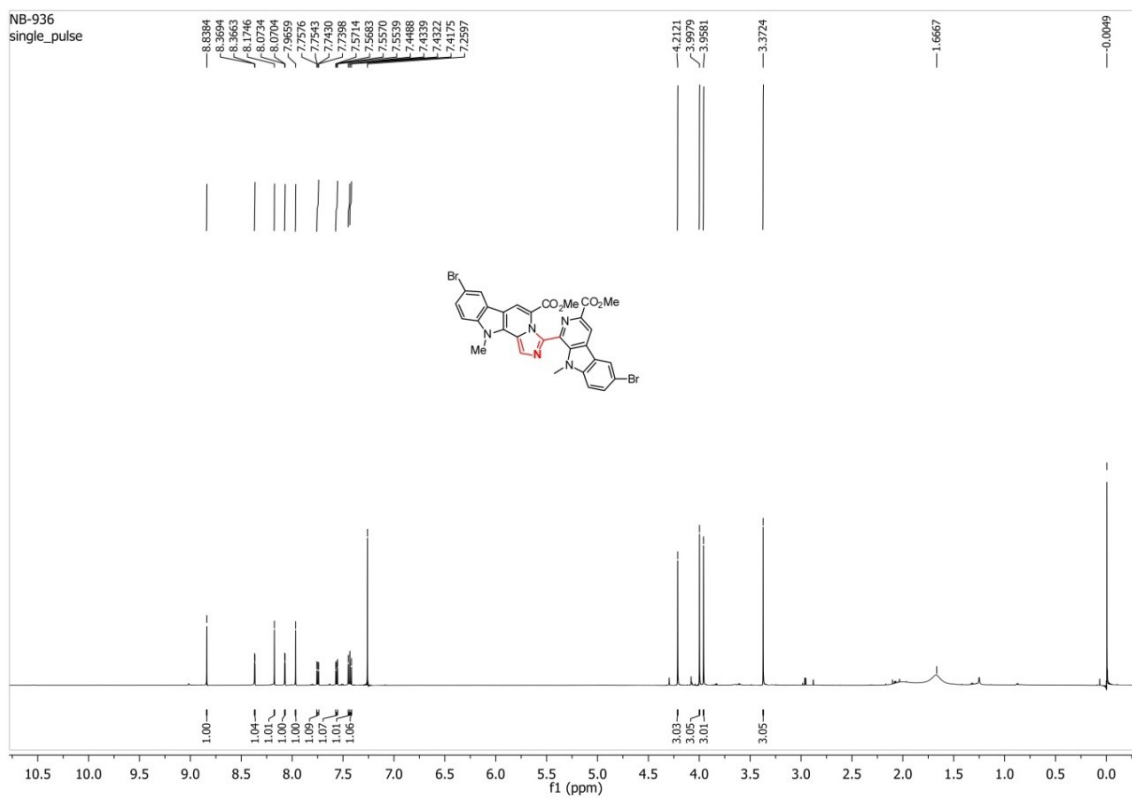

Figure S51.  $^1\text{H}$ -NMR spectrum of **19A**.

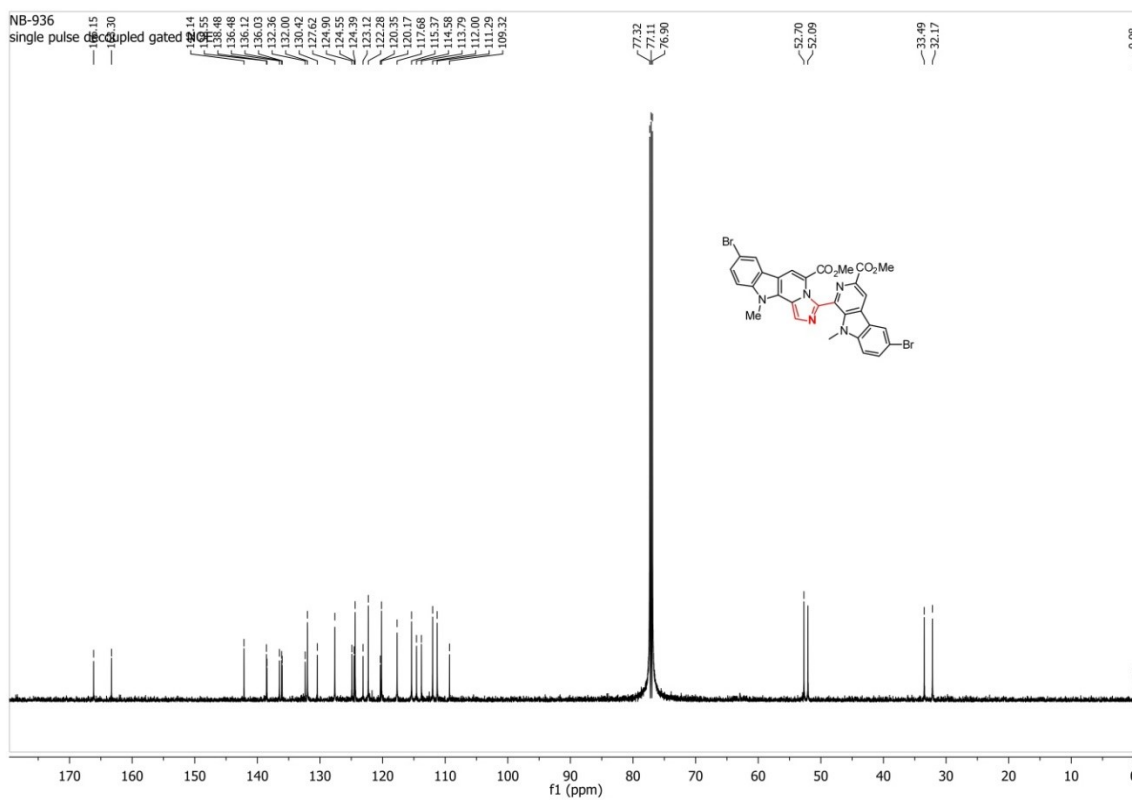

Figure S52.  $^{13}\text{C}$ -NMR spectrum of **19A**.

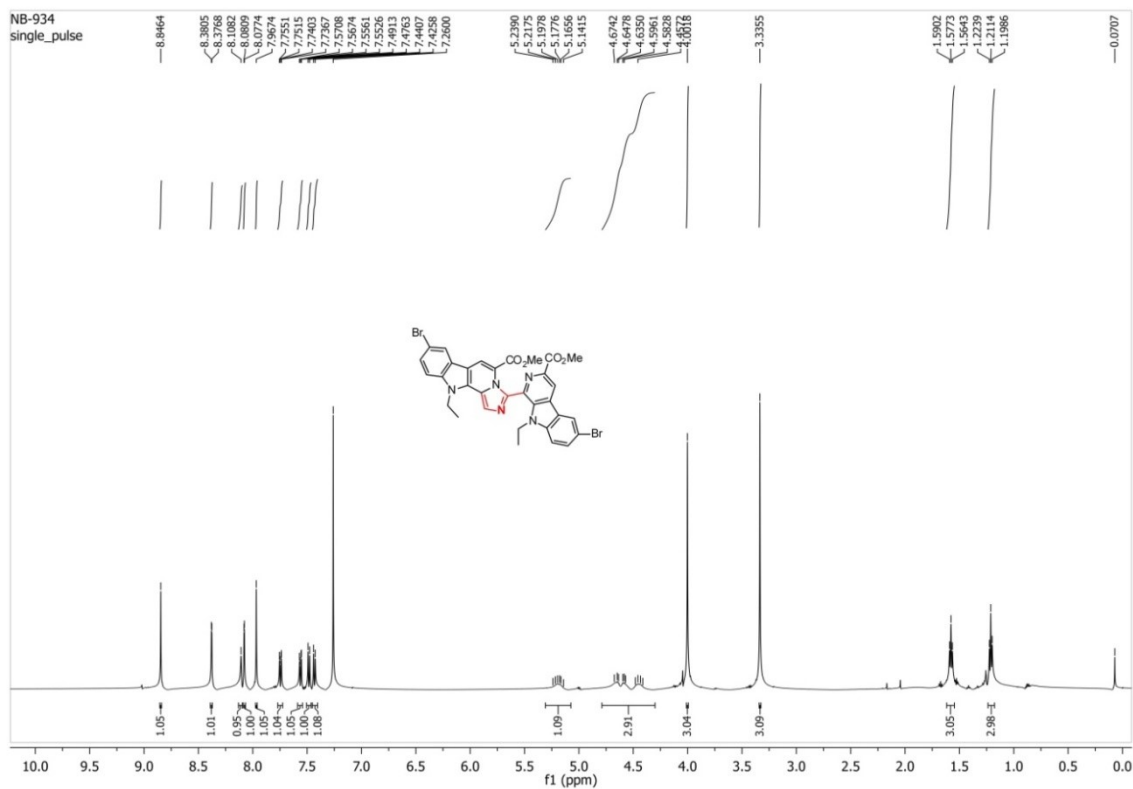

Figure S53.  $^1\text{H}$ -NMR spectrum of 19B.

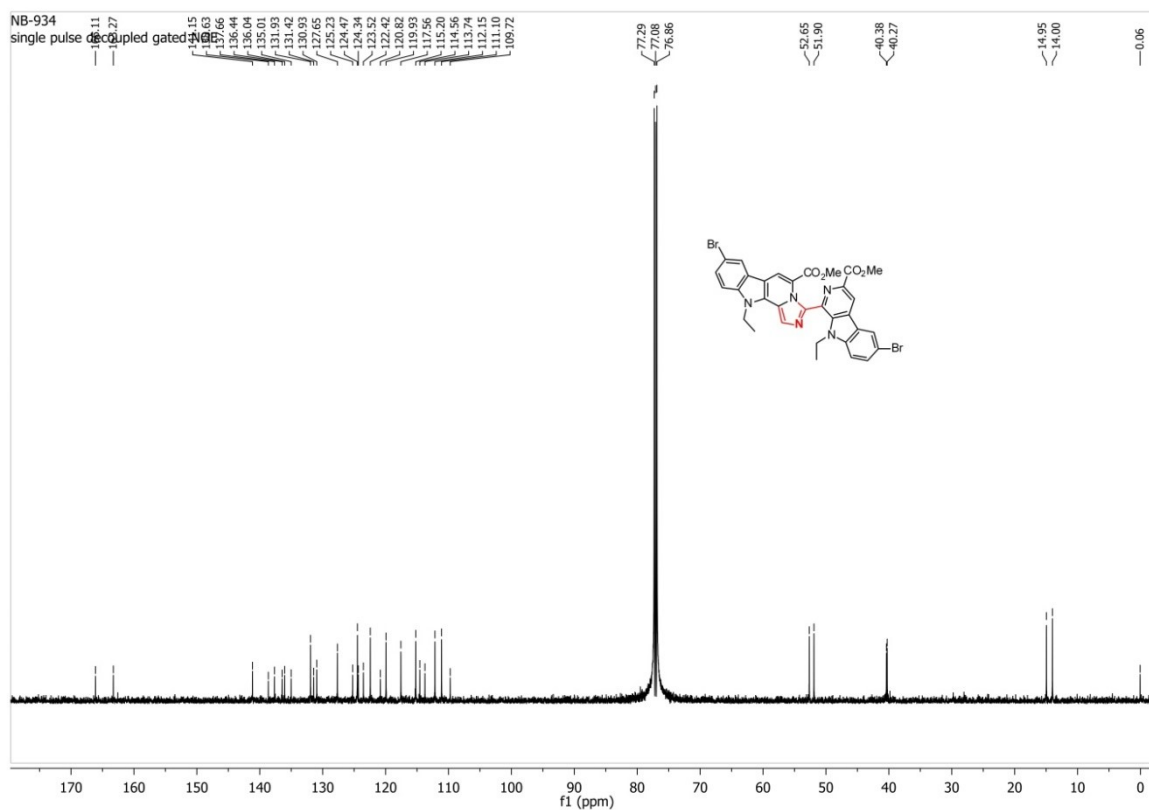

Figure S54.  $^{13}\text{C}$ -NMR spectrum of 19B.

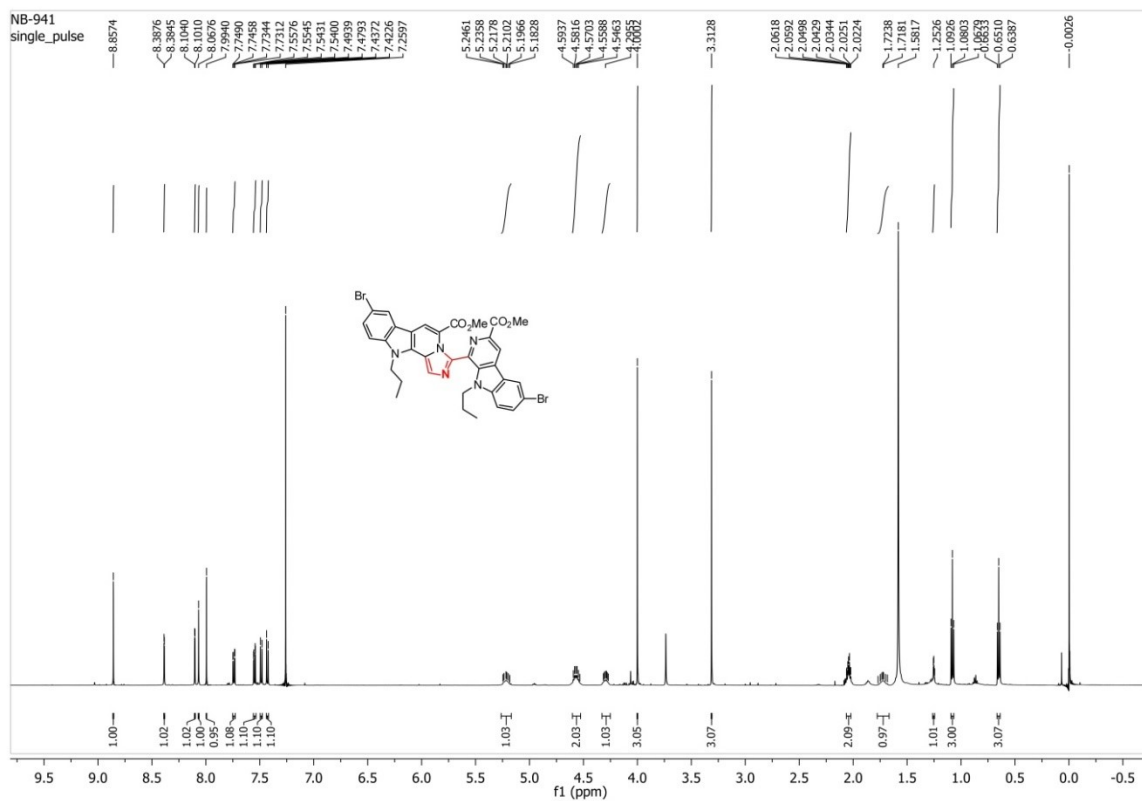

Figure S55.  $^1\text{H-NMR}$  spectrum of **19C**.

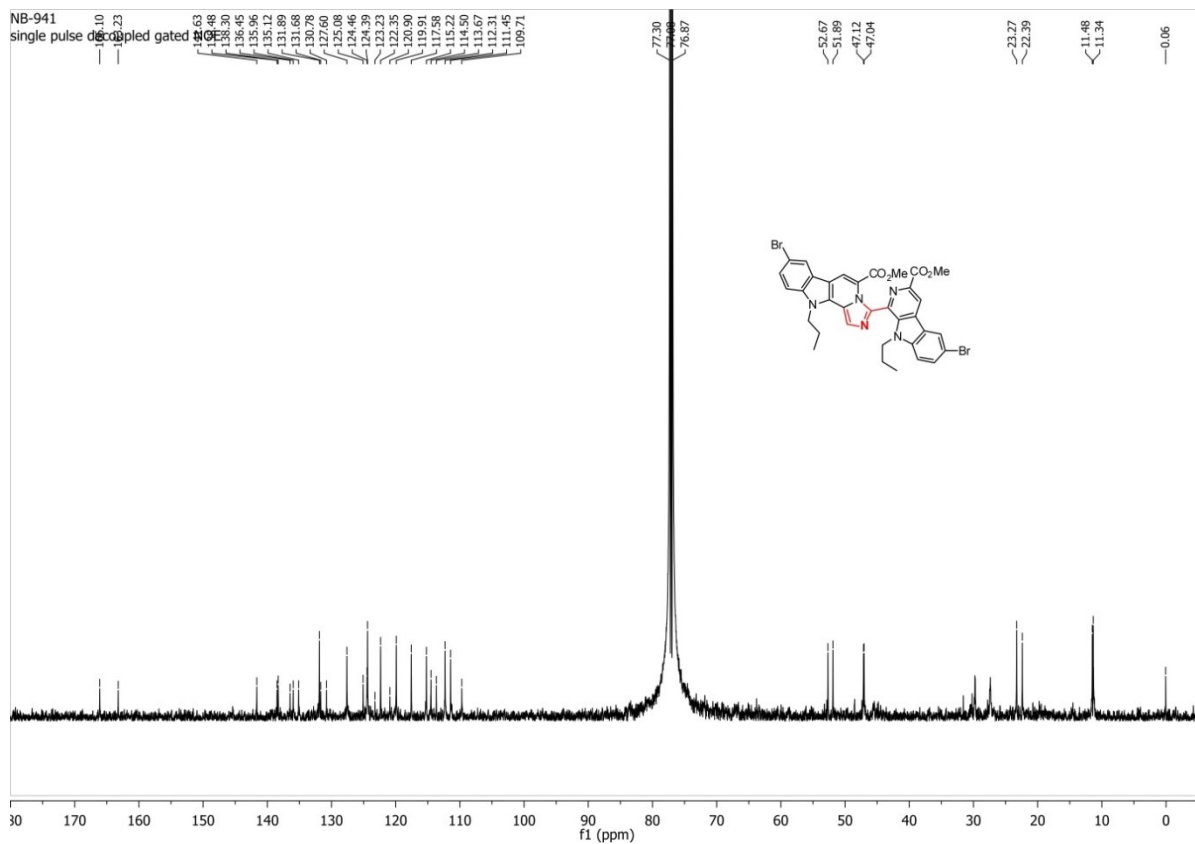

Figure S56.  $^{13}\text{C-NMR}$  spectrum of **19C**.

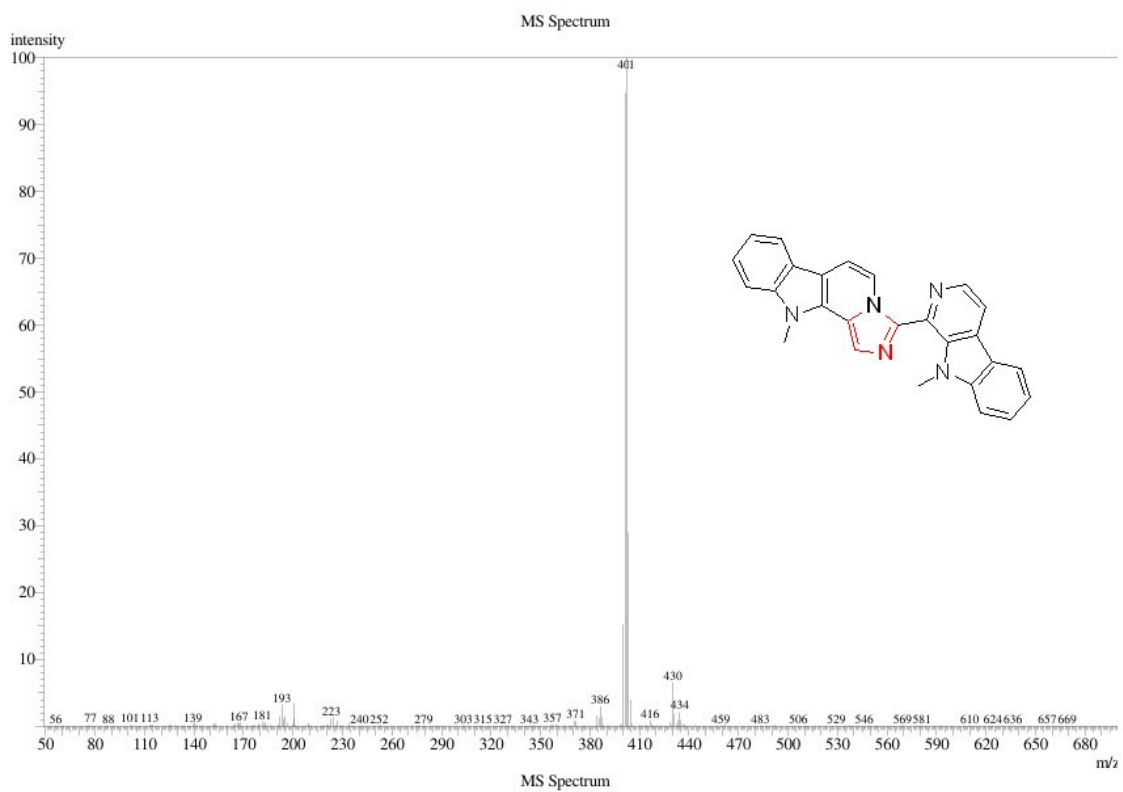

**Figure S57.** LCMS spectrum of **15A**.



## 2.0 Photophysical Studies of the Synthesized Compounds:

The fluorescent quantum yield ( $\Phi$ ) was measured relative to quinine sulfate ( $\Phi = 0.546$ ) (0.1 M H<sub>2</sub>SO<sub>4</sub> at 350 nm excitation) as a reference compound. For the measurement of UV-Vis absorption and fluorescence emission of samples, stock solution (1.0 mM) was prepared in CH<sub>2</sub>Cl<sub>2</sub> and diluted to final concentration (5.0  $\mu$ M) using CH<sub>2</sub>Cl<sub>2</sub>. These quantum yields (QY) were calculated by using the equation as follows:

$$\Phi_S = \Phi_R \times \frac{I_S}{I_R} \times \frac{A_R}{A_S} \times \frac{\eta_S^2}{\eta_R^2}$$

*R* – Reference; *S* – Sample

where  $\phi$  is the quantum yields,  $\eta$  is the refractive index of the solvent,  $I$  is the integrated fluorescence intensity and  $A$  is the absorbance.

**Figure S58.** Photophysical properties and graphical data of bis-carboline derivatives:

| <div style="text-align: center;"><b>14</b></div> 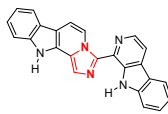 | UV-Vis         |                | Fluorescence |  | $\Phi_F$ |
|--------------------------------------------------------------------------------------------------------------------------------------|----------------|----------------|--------------|--|----------|
|                                                                                                                                      | $\lambda_{Ex}$ | $\lambda_{Em}$ | Intensity    |  |          |
|                                                                                                                                      | (nm)           | (nm)           |              |  |          |
|                                                                                                                                      | 297.26         | 449.12         | 323.27       |  | 0.34     |
|                                                                                                                                      | 379.65         | 446.72         | 92.49        |  | 0.39     |

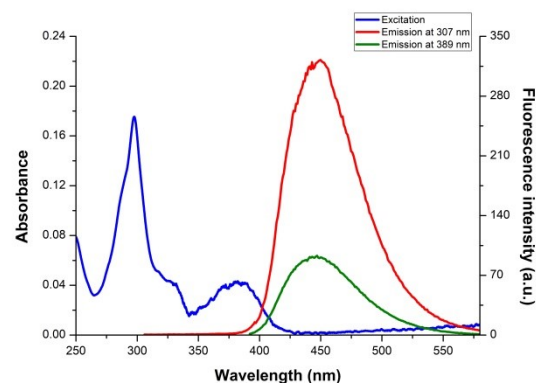

| <div style="text-align: center;"><b>15A</b></div> 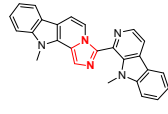 | UV-Vis         |                | Fluorescence |  | $\Phi_F$ |
|---------------------------------------------------------------------------------------------------------------------------------------|----------------|----------------|--------------|--|----------|
|                                                                                                                                       | $\lambda_{Ex}$ | $\lambda_{Em}$ | Intensity    |  |          |
|                                                                                                                                       | (nm)           | (nm)           |              |  |          |
|                                                                                                                                       | 303.34         | 497.87         | 98.09        |  | 0.14     |
|                                                                                                                                       | 395.16         | 496.96         | 50.74        |  | 0.15     |

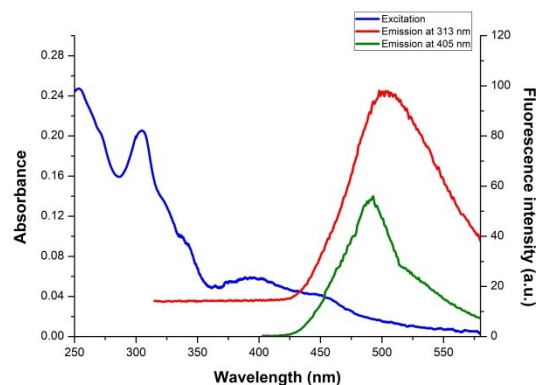

| <b>15B</b><br>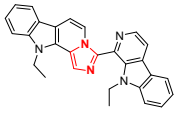 | UV-Vis         |                | Fluorescence |      | $\Phi_F$ |
|-------------------------------------------------------------------------------------------------|----------------|----------------|--------------|------|----------|
|                                                                                                 | $\lambda_{Ex}$ | $\lambda_{Em}$ | Intensity    |      |          |
|                                                                                                 | (nm)           | (nm)           |              |      |          |
|                                                                                                 | 304.14         | 498.93         | 122.71       | 0.19 |          |
|                                                                                                 | 402.86         | 499.84         | 87.19        | 0.41 |          |

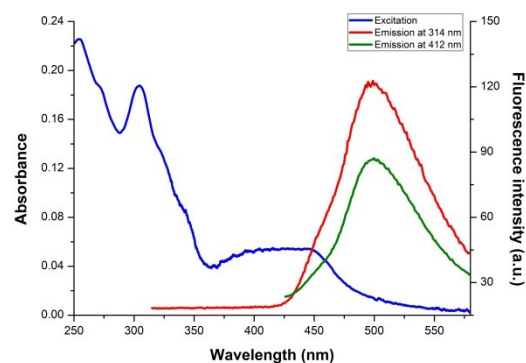

| <b>15C</b><br>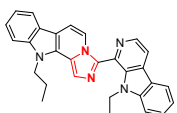 | UV-Vis         |                | Fluorescence |      | $\Phi_F$ |
|-------------------------------------------------------------------------------------------------|----------------|----------------|--------------|------|----------|
|                                                                                                 | $\lambda_{Ex}$ | $\lambda_{Em}$ | Intensity    |      |          |
|                                                                                                 | (nm)           | (nm)           |              |      |          |
|                                                                                                 | 309.26         | 468.10         | 69.14        | 0.17 |          |
|                                                                                                 | 358.21         | 465.35         | 48.41        | 0.21 |          |

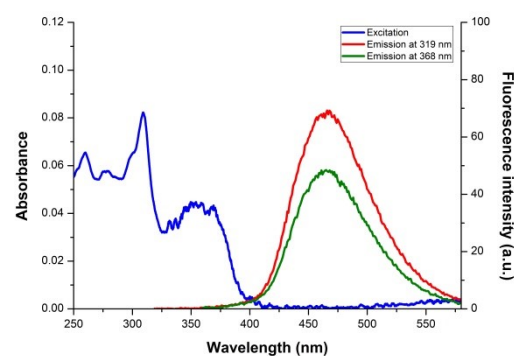

| <b>15E</b><br>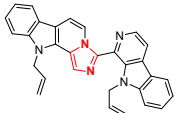 | UV-Vis         |                | Fluorescence |      | $\Phi_F$ |
|---------------------------------------------------------------------------------------------------|----------------|----------------|--------------|------|----------|
|                                                                                                   | $\lambda_{Ex}$ | $\lambda_{Em}$ | Intensity    |      |          |
|                                                                                                   | (nm)           | (nm)           |              |      |          |
|                                                                                                   | 297.89         | 446.83         | 257.57       | 0.24 |          |
|                                                                                                   | 380.60         | 442.90         | 71.50        | 0.23 |          |

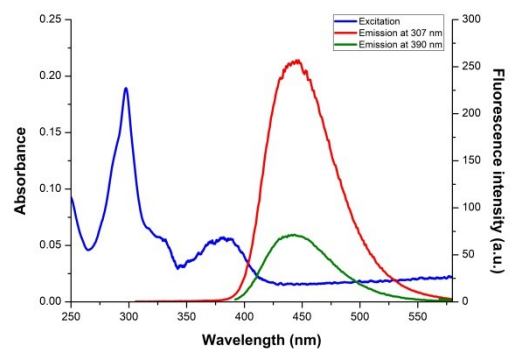

| <b>15F</b><br>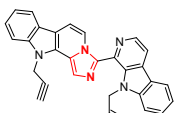 | UV-Vis         |                | Fluorescence |      | $\Phi_F$ |
|---------------------------------------------------------------------------------------------------|----------------|----------------|--------------|------|----------|
|                                                                                                   | $\lambda_{Ex}$ | $\lambda_{Em}$ | Intensity    |      |          |
|                                                                                                   | (nm)           | (nm)           |              |      |          |
|                                                                                                   | 300.78         | 451.43         | 109.31       | 0.10 |          |

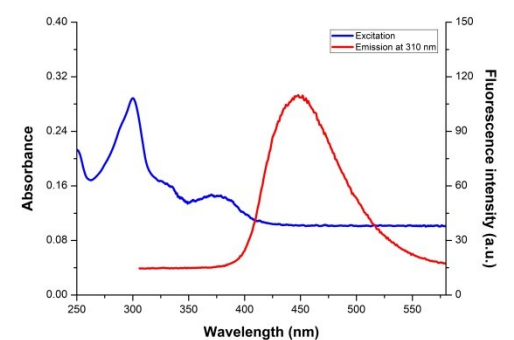

**Figure S59.** Photophysical properties and graphical data of

bis-carboline derivatives:

| <b>16A</b><br>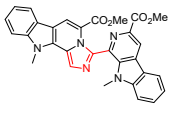 | UV-Vis         |                | Fluorescence |      | $\Phi_F$ |
|-------------------------------------------------------------------------------------------------|----------------|----------------|--------------|------|----------|
|                                                                                                 | $\lambda_{Ex}$ | $\lambda_{Em}$ | Intensity    |      |          |
|                                                                                                 | (nm)           | (nm)           | (nm)         | (nm) |          |
|                                                                                                 | 291            | 492.90         | 120.75       | 0.10 |          |
|                                                                                                 | 381            | 493.93         | 46.69        | 0.13 |          |

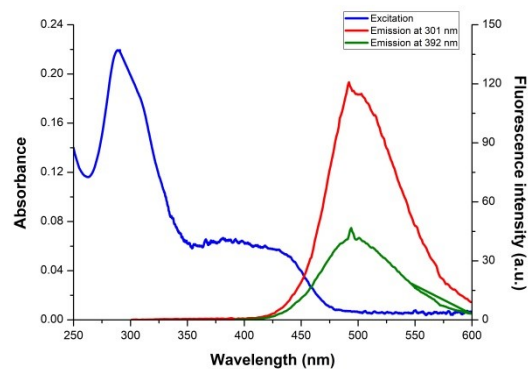

| <b>16B</b><br>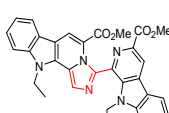 | UV-Vis         |                | Fluorescence |      | $\Phi_F$ |
|-------------------------------------------------------------------------------------------------|----------------|----------------|--------------|------|----------|
|                                                                                                 | $\lambda_{Ex}$ | $\lambda_{Em}$ | Intensity    |      |          |
|                                                                                                 | (nm)           | (nm)           | (nm)         | (nm) |          |
|                                                                                                 | 290.70         | 494.84         | 119.93       | 0.11 |          |
|                                                                                                 | 356.30         | 482.98         | 45.09        | 0.13 |          |

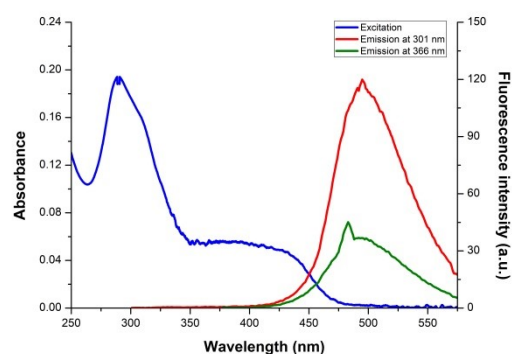

| <b>16C</b><br>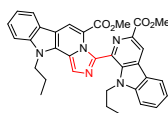 | UV-Vis         |                | Fluorescence |      | $\Phi_F$ |
|---------------------------------------------------------------------------------------------------|----------------|----------------|--------------|------|----------|
|                                                                                                   | $\lambda_{Ex}$ | $\lambda_{Em}$ | Intensity    |      |          |
|                                                                                                   | (nm)           | (nm)           | (nm)         | (nm) |          |
|                                                                                                   | 286.22         | 491.06         | 100.24       | 0.15 |          |
|                                                                                                   | 369.41         | 488.95         | 40.07        | 0.20 |          |

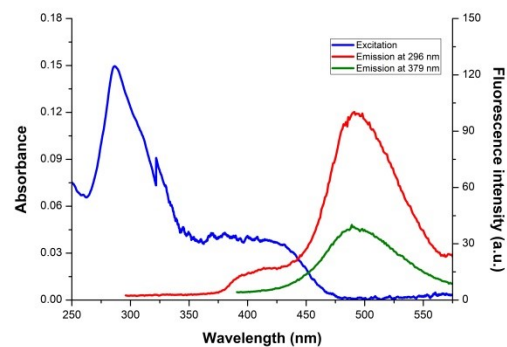

| <b>16E</b><br>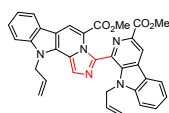 | UV-Vis         |                | Fluorescence |      | $\Phi_F$ |
|---------------------------------------------------------------------------------------------------|----------------|----------------|--------------|------|----------|
|                                                                                                   | $\lambda_{Ex}$ | $\lambda_{Em}$ | Intensity    |      |          |
|                                                                                                   | (nm)           | (nm)           | (nm)         | (nm) |          |
|                                                                                                   | 286.97         | 492.20         | 124.36       | 0.10 |          |
|                                                                                                   | 372.43         | 490.90         | 54.35        | 0.18 |          |

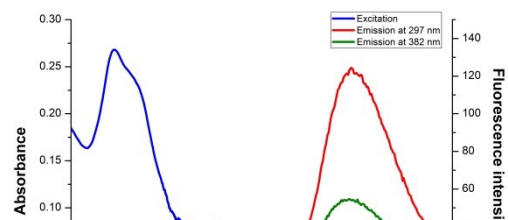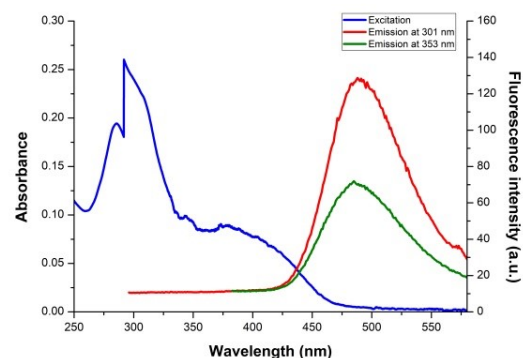

| <b>16F</b><br>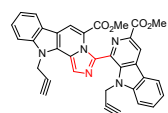 | UV-Vis | Fluorescence | $\Phi_F$ |
|---------------------------------------------------------------------------------------------------|--------|--------------|----------|
|                                                                                                   |        |              | 35       |

|  | $\lambda_{\text{Ex}}$<br>(nm) | $\lambda_{\text{Em}}$<br>(nm) | Intensity |      |
|--|-------------------------------|-------------------------------|-----------|------|
|  | 291.52                        | 488                           | 128.72    | 0.12 |
|  | 343.32                        | 484.92                        | 71.93     | 0.18 |

| <b>16G</b><br>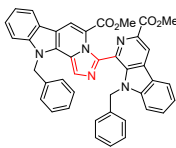 | UV-Vis                        |                               | Fluorescence |      | $\Phi_{\text{F}}$ |
|-------------------------------------------------------------------------------------------------|-------------------------------|-------------------------------|--------------|------|-------------------|
|                                                                                                 | $\lambda_{\text{Ex}}$<br>(nm) | $\lambda_{\text{Em}}$<br>(nm) | Intensity    |      |                   |
|                                                                                                 | 287.02                        | 497.87                        | 81.30        |      |                   |
| 366.80                                                                                          | 485.97                        | 40.79                         |              | 0.21 |                   |

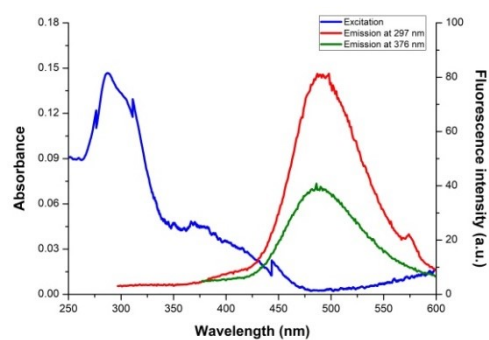

| <b>16H</b><br>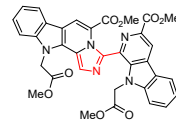 | UV-Vis                        |                               | Fluorescence |      | $\Phi_{\text{F}}$ |
|---------------------------------------------------------------------------------------------------|-------------------------------|-------------------------------|--------------|------|-------------------|
|                                                                                                   | $\lambda_{\text{Ex}}$<br>(nm) | $\lambda_{\text{Em}}$<br>(nm) | Intensity    |      |                   |
|                                                                                                   | 287.82                        | 487.47                        | 86.75        |      |                   |
| 369.41                                                                                            | 479.73                        | 42.82                         |              | 0.11 |                   |

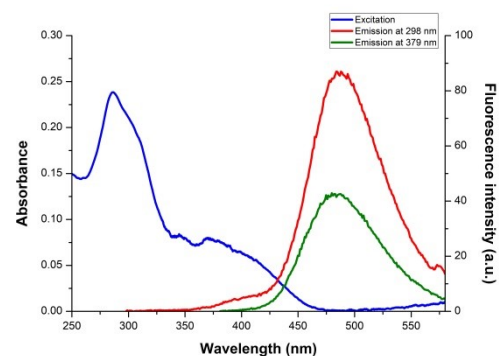

| <b>17A</b><br>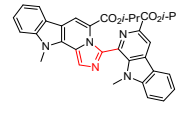 | UV-Vis                        |                               | Fluorescence |      | $\Phi_{\text{F}}$ |
|---------------------------------------------------------------------------------------------------|-------------------------------|-------------------------------|--------------|------|-------------------|
|                                                                                                   | $\lambda_{\text{Ex}}$<br>(nm) | $\lambda_{\text{Em}}$<br>(nm) | Intensity    |      |                   |
|                                                                                                   | 289.29                        | 496.96                        | 128.24       |      |                   |
| 373.14                                                                                            | 498.03                        | 51.13                         |              | 0.12 |                   |

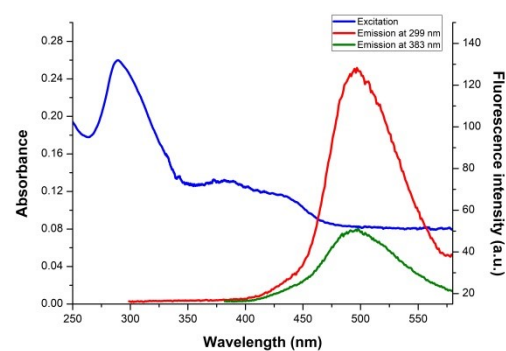

| <b>17B</b><br>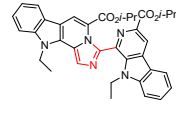 | UV-Vis                        |                               | Fluorescence |  | $\Phi_{\text{F}}$ |
|---------------------------------------------------------------------------------------------------|-------------------------------|-------------------------------|--------------|--|-------------------|
|                                                                                                   | $\lambda_{\text{Ex}}$<br>(nm) | $\lambda_{\text{Em}}$<br>(nm) | Intensity    |  |                   |
|                                                                                                   | 288.78                        | 499.04                        | 139.35       |  |                   |

|  |        |        |       |      |
|--|--------|--------|-------|------|
|  | 381.40 | 493.93 | 69.50 | 0.34 |
|--|--------|--------|-------|------|

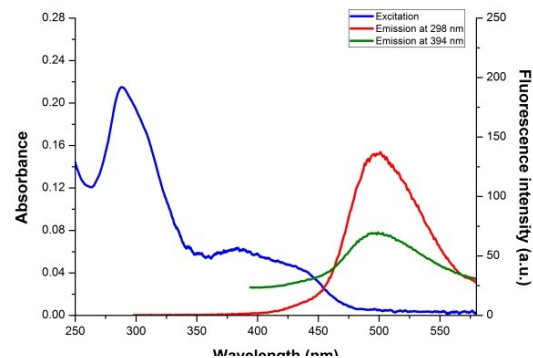

| <b>17C</b><br>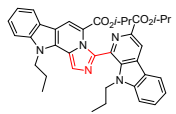 | UV-Vis         |                | Fluorescence |      | $\Phi_F$ |
|-------------------------------------------------------------------------------------------------|----------------|----------------|--------------|------|----------|
|                                                                                                 | $\lambda_{Ex}$ | $\lambda_{Em}$ | Intensity    |      |          |
|                                                                                                 | (nm)           | (nm)           |              |      |          |
|                                                                                                 | 289.58         | 490.90         | 150.07       | 0.12 |          |
|                                                                                                 | 388.29         | 493.03         | 57.97        | 0.16 |          |

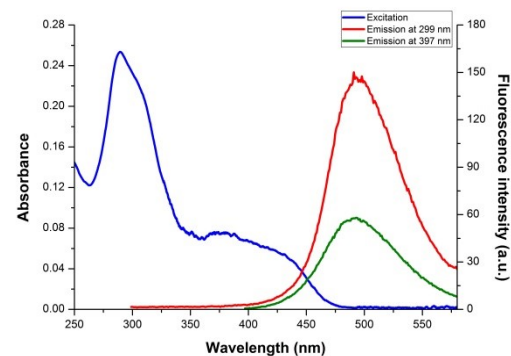

| <b>17E</b><br>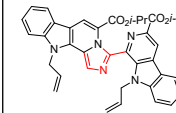 | UV-Vis         |                | Fluorescence |      | $\Phi_F$ |
|--------------------------------------------------------------------------------------------------|----------------|----------------|--------------|------|----------|
|                                                                                                  | $\lambda_{Ex}$ | $\lambda_{Em}$ | Intensity    |      |          |
|                                                                                                  | (nm)           | (nm)           |              |      |          |
|                                                                                                  | 295.40         | 456.16         | 331.07       | 0.34 |          |
|                                                                                                  | 379.29         | 454.02         | 92.42        | 0.37 |          |

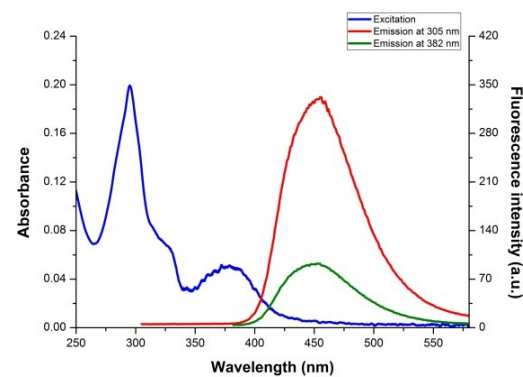

| <b>17F</b><br>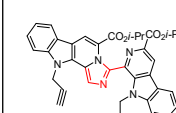 | UV-Vis         |                | Fluorescence |      | $\Phi_F$ |
|---------------------------------------------------------------------------------------------------|----------------|----------------|--------------|------|----------|
|                                                                                                   | $\lambda_{Ex}$ | $\lambda_{Em}$ | Intensity    |      |          |
|                                                                                                   | (nm)           | (nm)           |              |      |          |
|                                                                                                   | 297.27         | 446.08         | 267.59       | 0.35 |          |
|                                                                                                   | 381.41         | 438.10         | 76.26        | 0.55 |          |

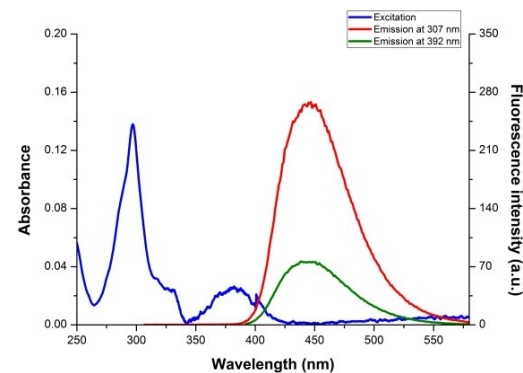

| <b>17G</b> | UV-Vis         |                | Fluorescence |  | $\Phi_F$ |
|------------|----------------|----------------|--------------|--|----------|
|            | $\lambda_{Ex}$ | $\lambda_{Em}$ | Intensity    |  |          |
|            | (nm)           | (nm)           |              |  |          |

|                                                                                   |        |        |        |       |
|-----------------------------------------------------------------------------------|--------|--------|--------|-------|
| 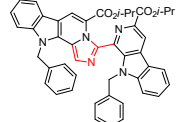 | 295.66 | 448.19 | 106.47 | 0.21  |
|                                                                                   | 372.76 | 453.03 | 40.01  | 0.275 |

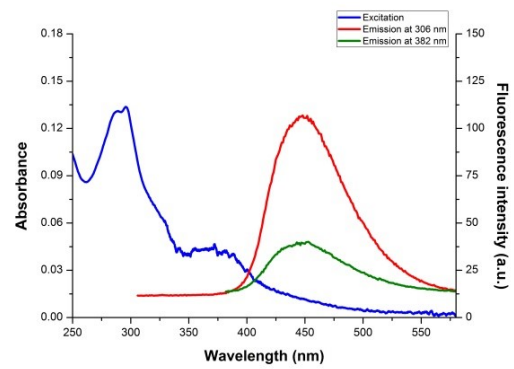

Supplement: d4nj01467g1.pdf [file d4nj01467g1.pdf]
